# Supplementary material for: Non-peptide compounds from Kronopolites svenhedini (Verhoeff) and their antitumor and iNOS inhibitory activities
Source: publisher site journal article supplement (doi:10.3762/bjoc.19.59), 2023-06-07
Supplement: Additional file 1 [file 1860-5397-19-59-S1.pdf]

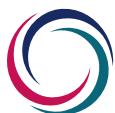

## Supporting Information

for

### **Non-peptide compounds from *Kronopolites svenhedini* (Verhoeff) and their antitumor and iNOS inhibitory activities**

Yuan-Nan Yuan, Jin-Qiang Li, Hong-Bin Fang, Shao-Jun Xing, Yong-Ming Yan  
and Yong-Xian Cheng

*Beilstein J. Org. Chem.* **2023**, 19, 789–799. doi:10.3762/bjoc.19.59

### **NMR, HRESIMS, and CD spectra for new compounds and the figures of antitumor activity assay of CD8<sup>+</sup> T cells in vitro**

## Table of contents

|                                                                                             |
|---------------------------------------------------------------------------------------------|
| Figure S1. $^1\text{H}$ NMR spectrum of <b>1</b> in methanol- $d_4$                         |
| Figure S2. $^{13}\text{C}$ NMR and DEPT spectrum of <b>1</b> in methanol- $d_4$             |
| Figure S3. $^1\text{H}$ - $^1\text{H}$ COSY spectrum of <b>1</b> in methanol- $d_4$         |
| Figure S4. HSQC spectrum of <b>1</b> in methanol- $d_4$                                     |
| Figure S5. HMBC spectrum of <b>1</b> in methanol- $d_4$                                     |
| Figure S6. HRESIMS spectrum of <b>1</b>                                                     |
| Figure S7. CD spectrum of <b>1</b> in MeOH                                                  |
| Figure S8. $^1\text{H}$ NMR spectrum of <b>2</b> in methanol- $d_4$                         |
| Figure S9. $^{13}\text{C}$ NMR and DEPT spectrum of <b>2</b> in methanol- $d_4$             |
| Figure S10. $^1\text{H}$ - $^1\text{H}$ COSY spectrum of <b>2</b> in methanol- $d_4$        |
| Figure S10. HSQC spectrum of <b>2</b> in methanol- $d_4$                                    |
| Figure S12. HMBC spectrum of <b>2</b> in methanol- $d_4$                                    |
| Figure S13. HRESIMS spectrum of <b>2</b>                                                    |
| Figure S14. $^1\text{H}$ NMR spectrum of <b>3</b> in methanol- $d_4$                        |
| Figure S15. $^{13}\text{C}$ NMR and DEPT spectrum of <b>3</b> in methanol- $d_4$            |
| Figure S16. $^1\text{H}$ - $^1\text{H}$ COSY spectrum of <b>3</b> in methanol- $d_4$        |
| Figure S17. HSQC spectrum of <b>3</b> in methanol- $d_4$                                    |
| Figure S18. HMBC spectrum of <b>3</b> in methanol- $d_4$                                    |
| Figure S19. HRESIMS spectrum of <b>3</b>                                                    |
| Figure S20. $^1\text{H}$ NMR spectrum of <b>4</b> in methanol- $d_4$                        |
| Figure S21. $^{13}\text{C}$ NMR and DEPT spectrum of <b>4</b> in methanol- $d_4$            |
| Figure S22. $^1\text{H}$ - $^1\text{H}$ COSY spectrum of <b>4</b> in methanol- $d_4$        |
| Figure S23. HSQC spectrum of <b>4</b> in methanol- $d_4$                                    |
| Figure S24. HMBC spectrum of <b>4</b> in methanol- $d_4$                                    |
| Figure S25. HRESIMS spectrum of <b>4</b>                                                    |
| Figure S26. CD spectrum of <b>4</b> in MeOH                                                 |
| Figure S27. $^1\text{H}$ NMR spectrum of <b>7</b> in methanol- $d_4$                        |
| Figure S28. $^{13}\text{C}$ NMR and DEPT spectrum of <b>7</b> in methanol- $d_4$            |
| Figure S29. $^1\text{H}$ - $^1\text{H}$ COSY spectrum of <b>7</b> in methanol- $d_4$        |
| Figure S30. HSQC spectrum of <b>7</b> in methanol- $d_4$                                    |
| Figure S31. HMBC spectrum of <b>7</b> in methanol- $d_4$                                    |
| Figure S32. ROESY spectrum of <b>7</b> in methanol- $d_4$                                   |
| Figure S33. HRESIMS spectrum of <b>7</b>                                                    |
| Figure S34. $^1\text{H}$ NMR spectrum of <b>8</b> in methanol- $d_4$                        |
| Figure S35. $^{13}\text{C}$ NMR and DEPT spectrum of <b>8</b> in methanol- $d_4$            |
| Figure S36. $^1\text{H}$ - $^1\text{H}$ COSY spectrum of <b>8</b> in methanol- $d_4$        |
| Figure S37. HSQC spectrum of <b>8</b> in methanol- $d_4$                                    |
| Figure S38. HMBC spectrum of <b>8</b> in methanol- $d_4$                                    |
| Figure S39. ROESY spectrum of <b>8</b> in methanol- $d_4$                                   |
| Figure S40. HRESIMS spectrum of <b>8</b>                                                    |
| Figure S41. Compounds inhibited cell proliferation of Panc02-h7-GP-GFP cells.               |
| Figure S42. Purification of CD8 <sup>+</sup> T cells in vitro.                              |
| Figure S43. Compounds affected the antitumor activity of CD8 <sup>+</sup> T cells in vitro. |

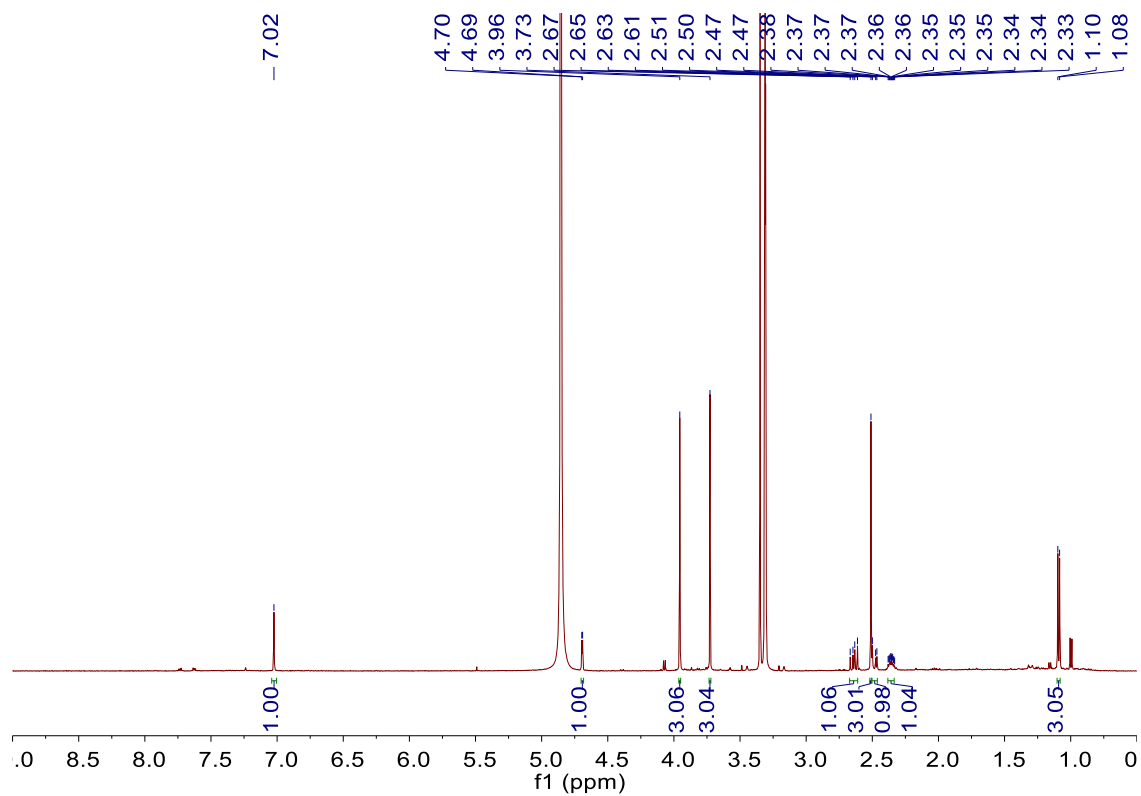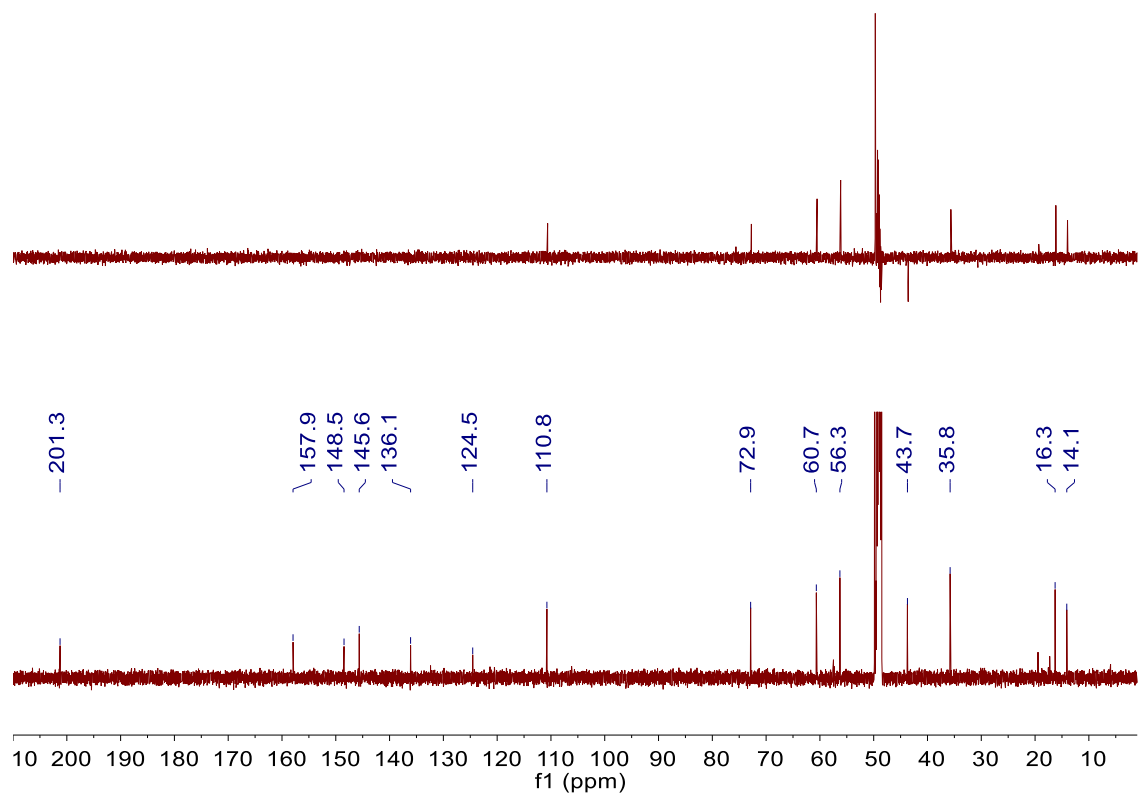

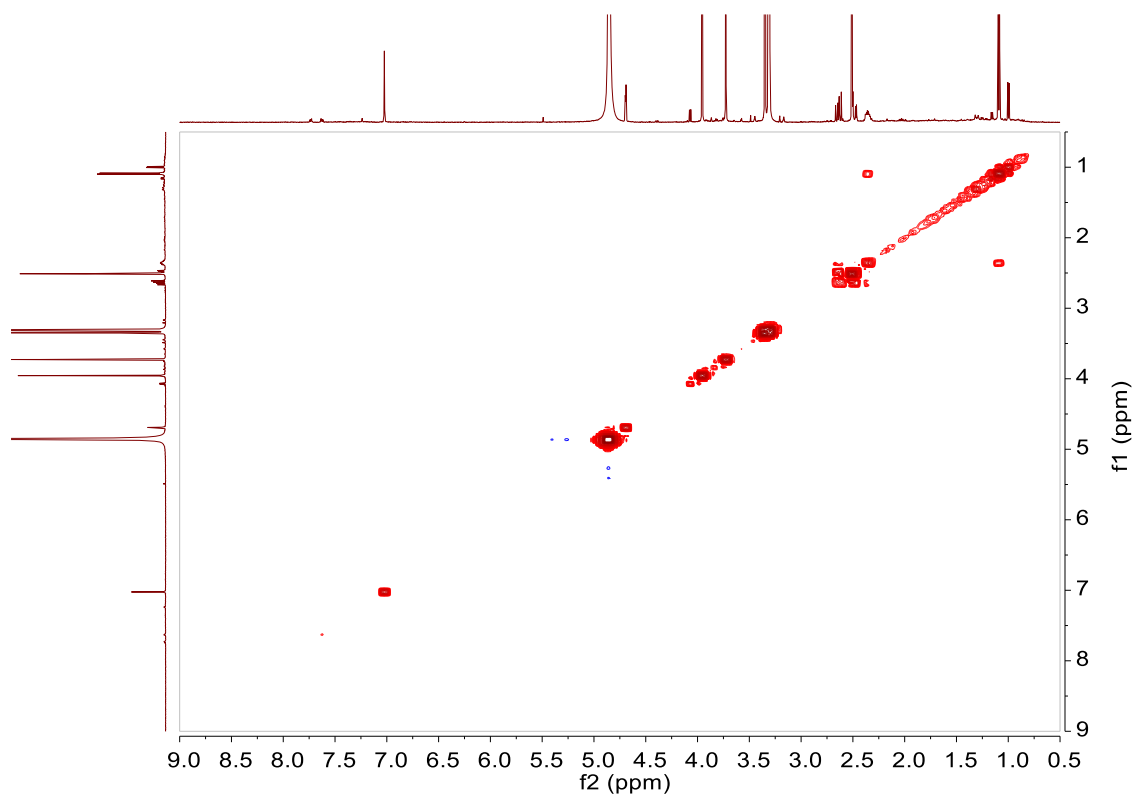

**Figure S3:**  $^1\text{H}$ - $^1\text{H}$  COSY spectrum of **1** in methanol- $d_4$

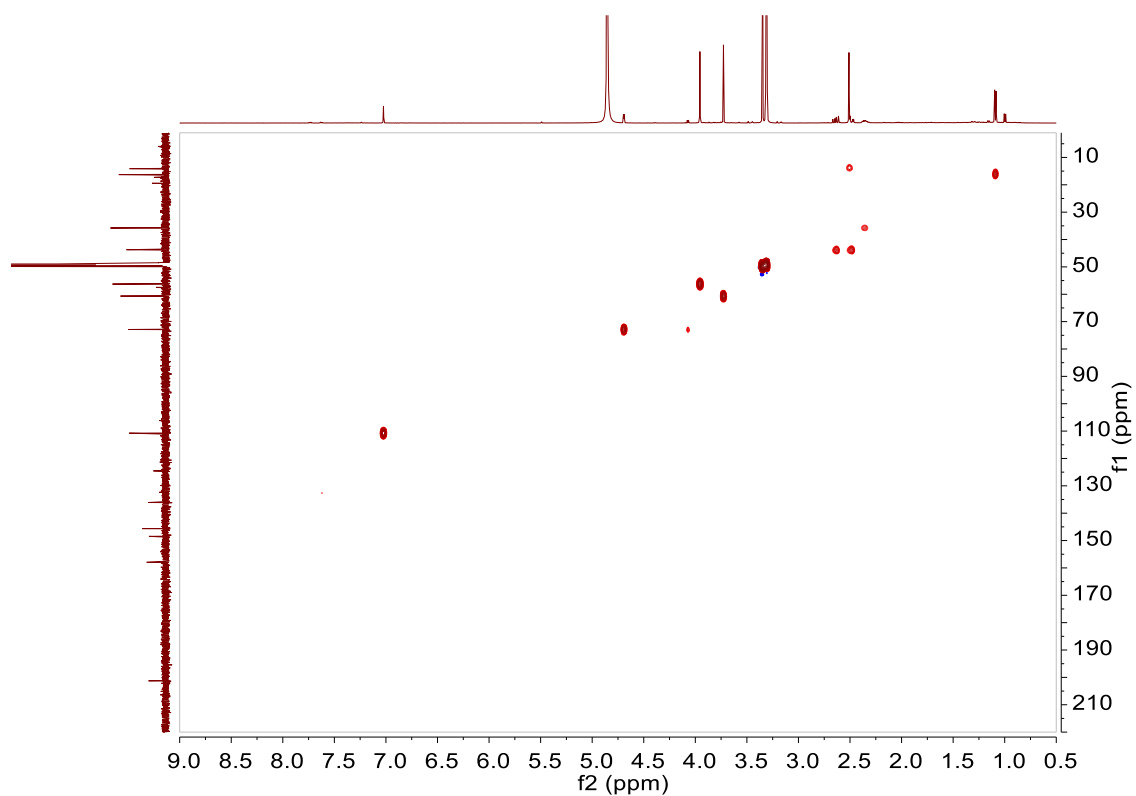

**Figure S4:** HSQC spectrum of **1** in methanol- $d_4$

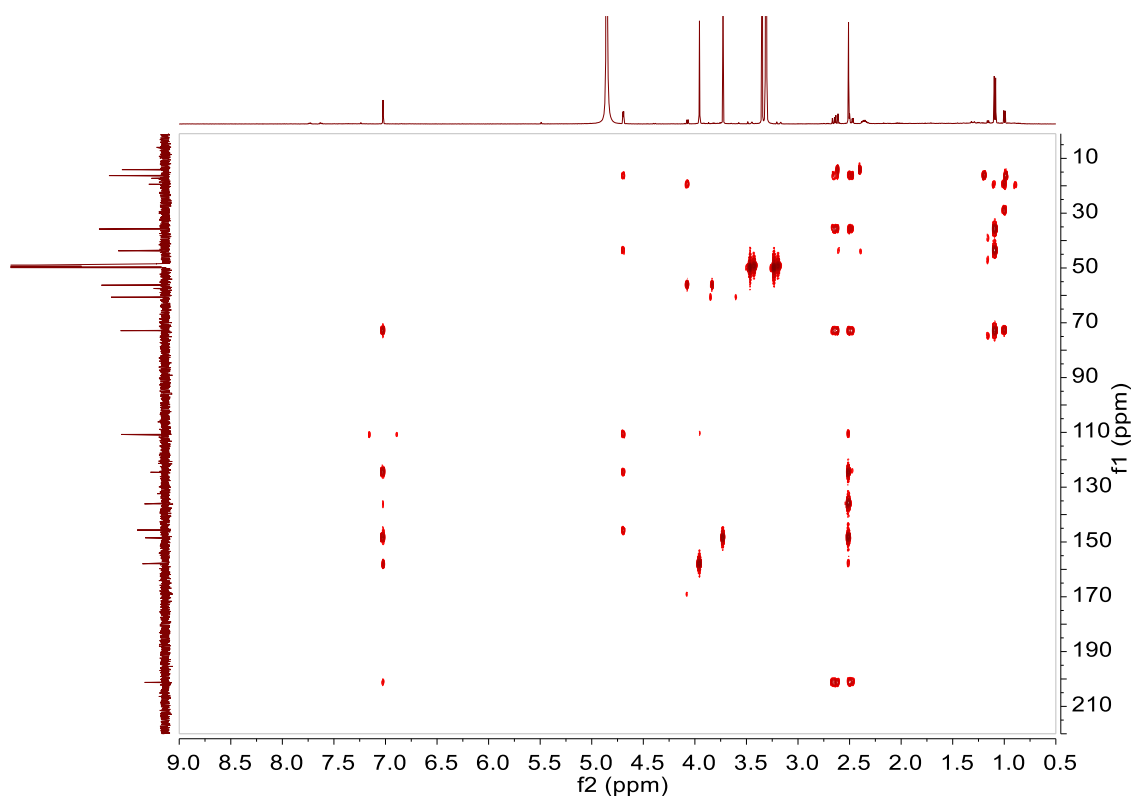

**Figure S5:** HMBC spectrum of **1** in methanol- $d_4$

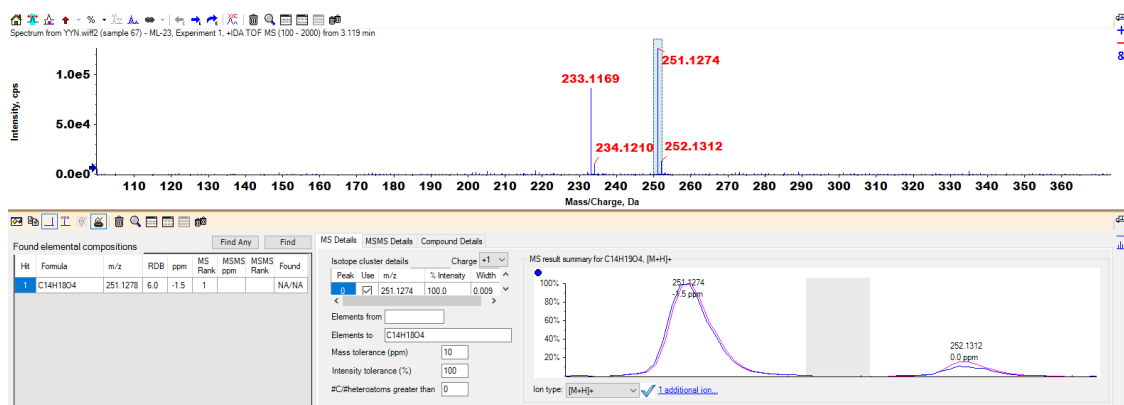

**Figure S6:** HRESIMS spectrum of **1**

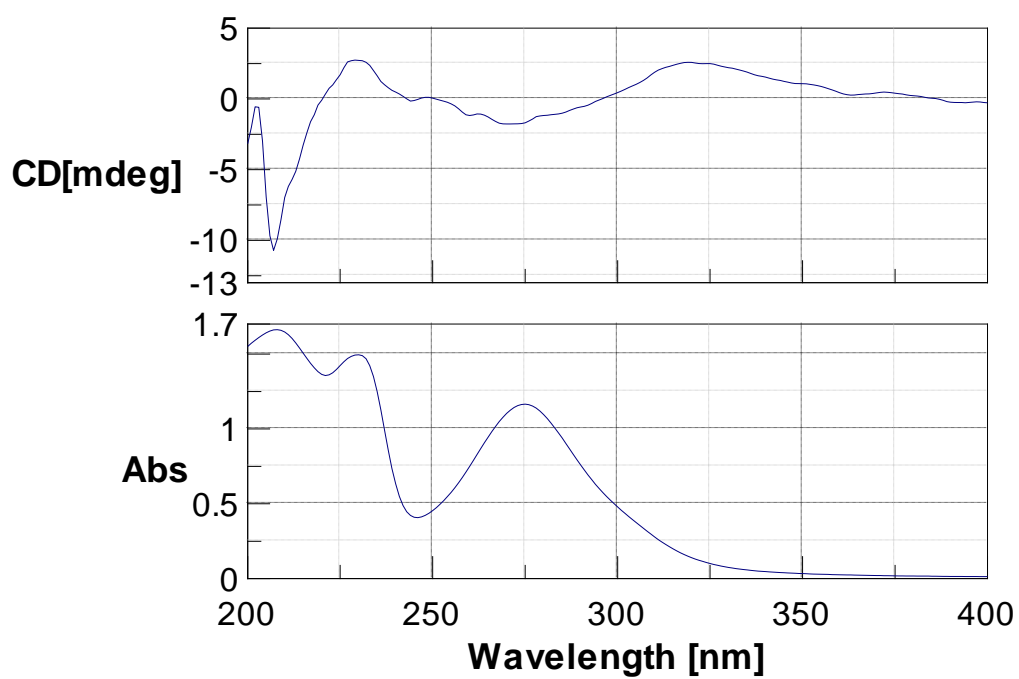

Figure S7: CD spectrum of **1** in MeOH

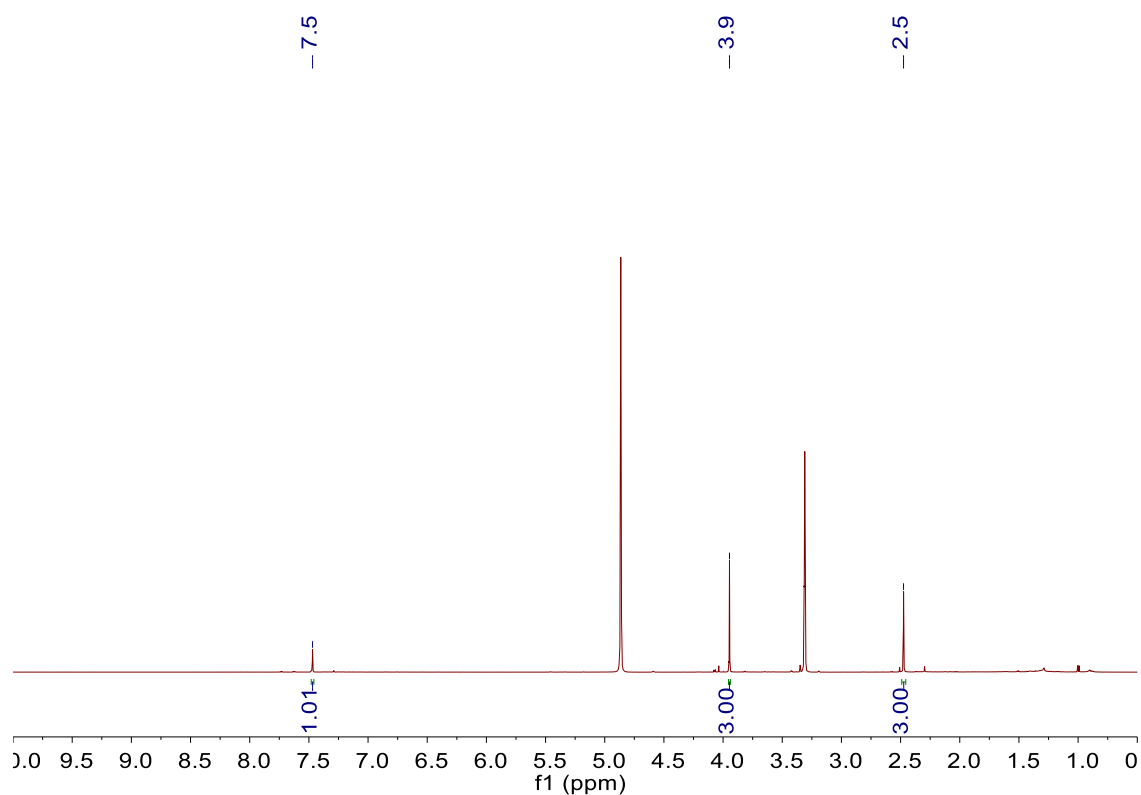

Figure S8: <sup>1</sup>H NMR spectrum of **2** in methanol-*d*<sub>4</sub>

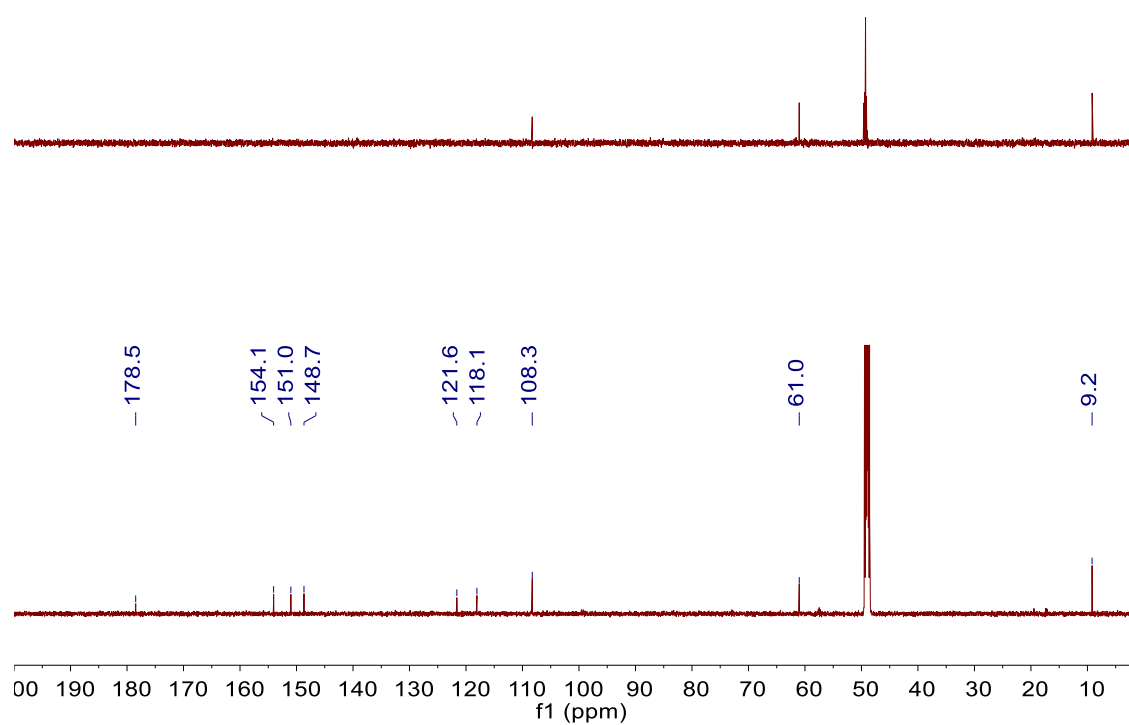

**Figure S9:**  $^{13}\text{C}$  NMR and DEPT spectrum of **2** in methanol- $d_4$

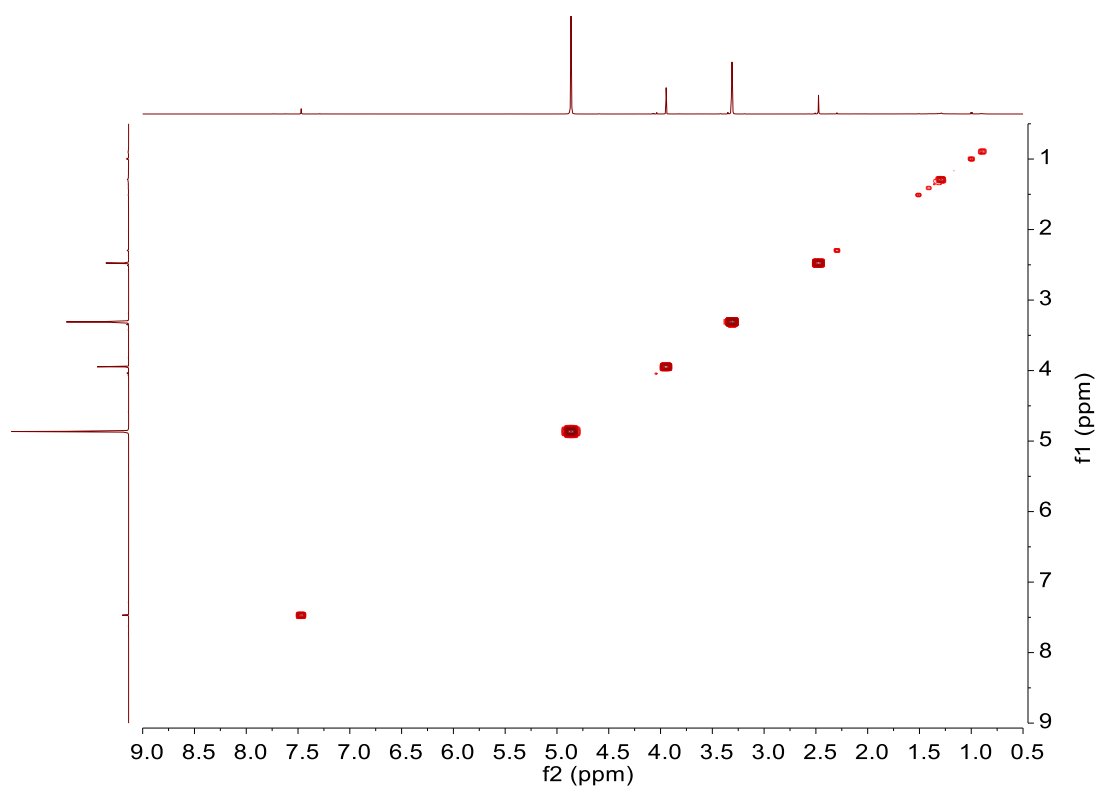

**Figure S10:**  $^1\text{H}$ - $^1\text{H}$  COSY spectrum of **2** in methanol- $d_4$

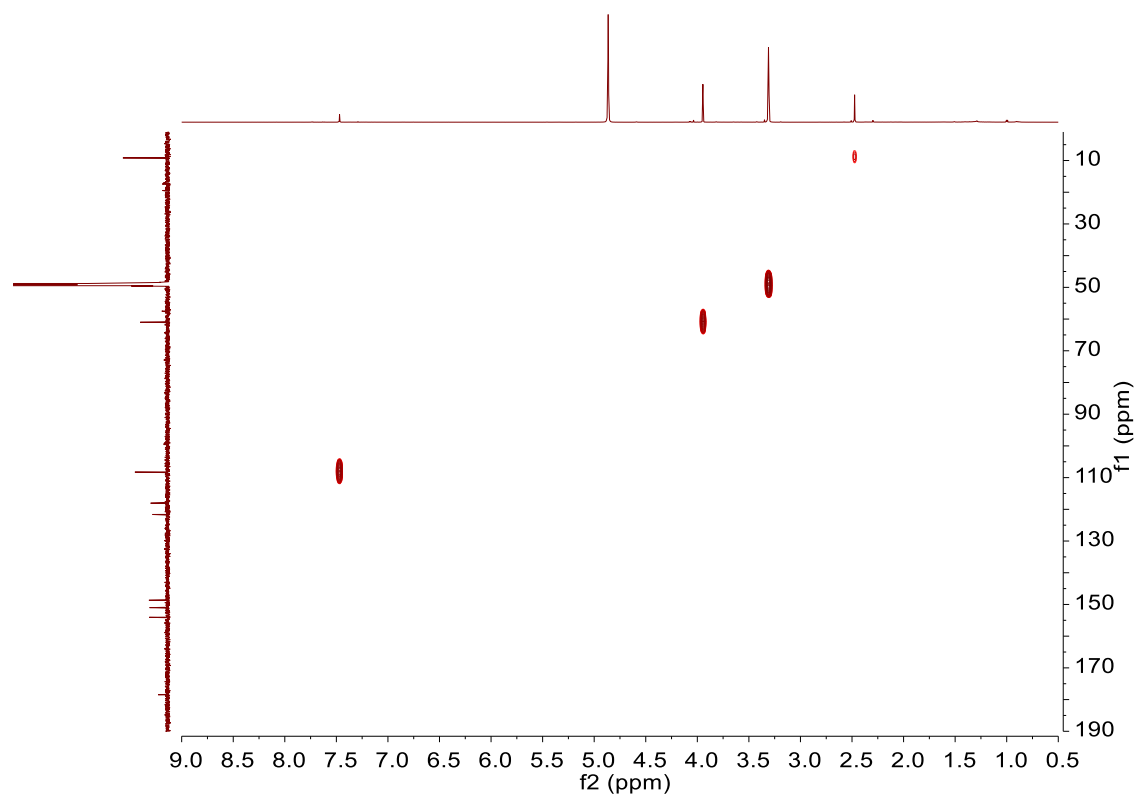

**Figure S11:** HSQC spectrum of **2** in methanol- $d_4$

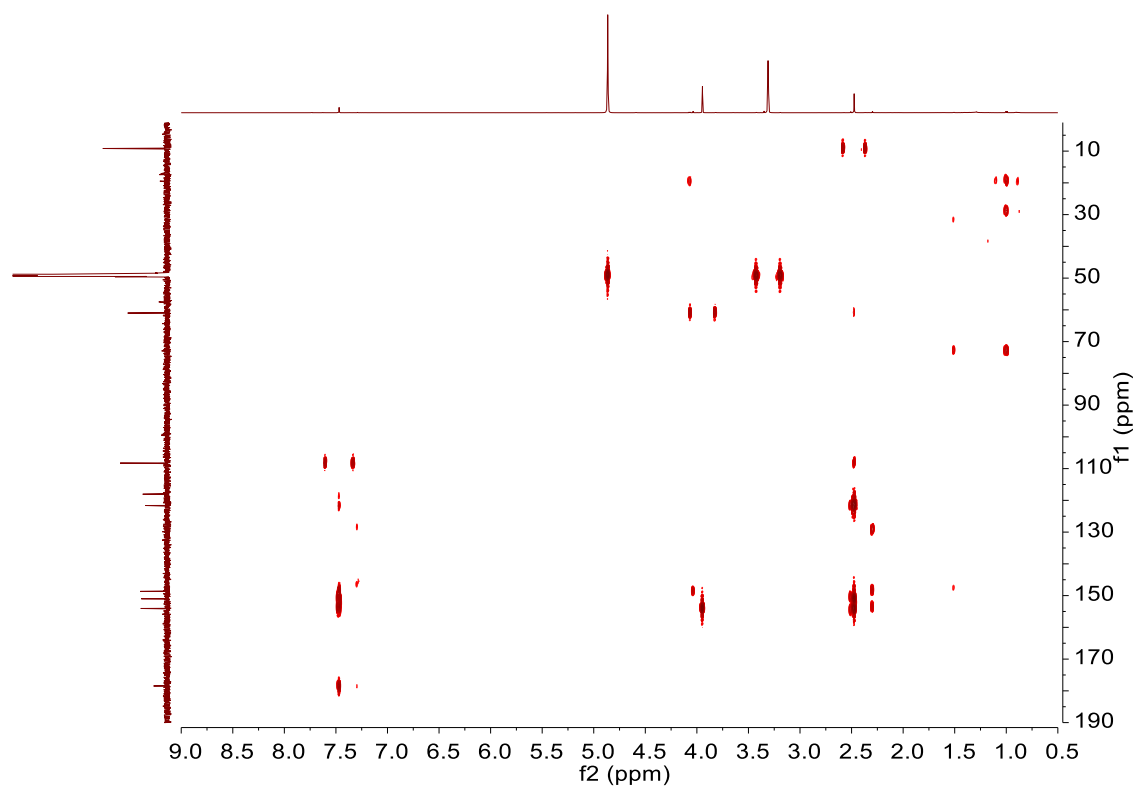

**Figure S12:** HMBC spectrum of **2** in methanol- $d_4$



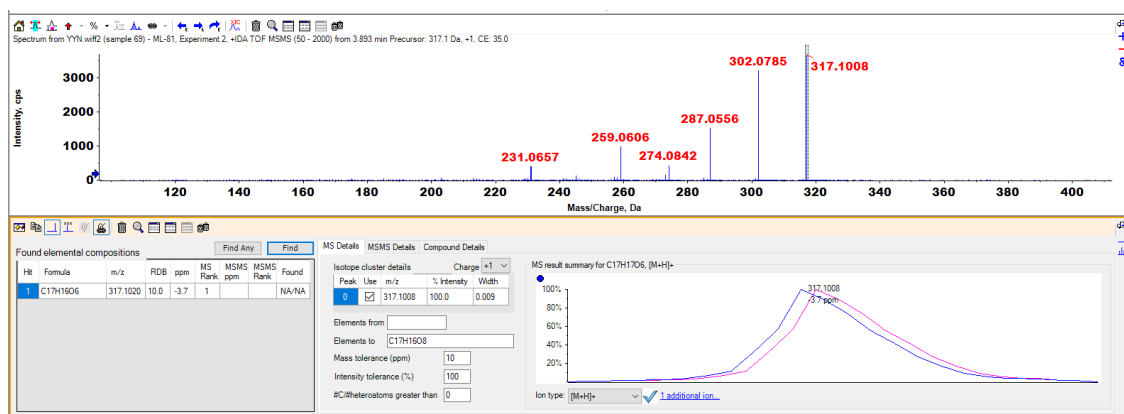

**Figure S13: HRESIMS spectrum of 2**

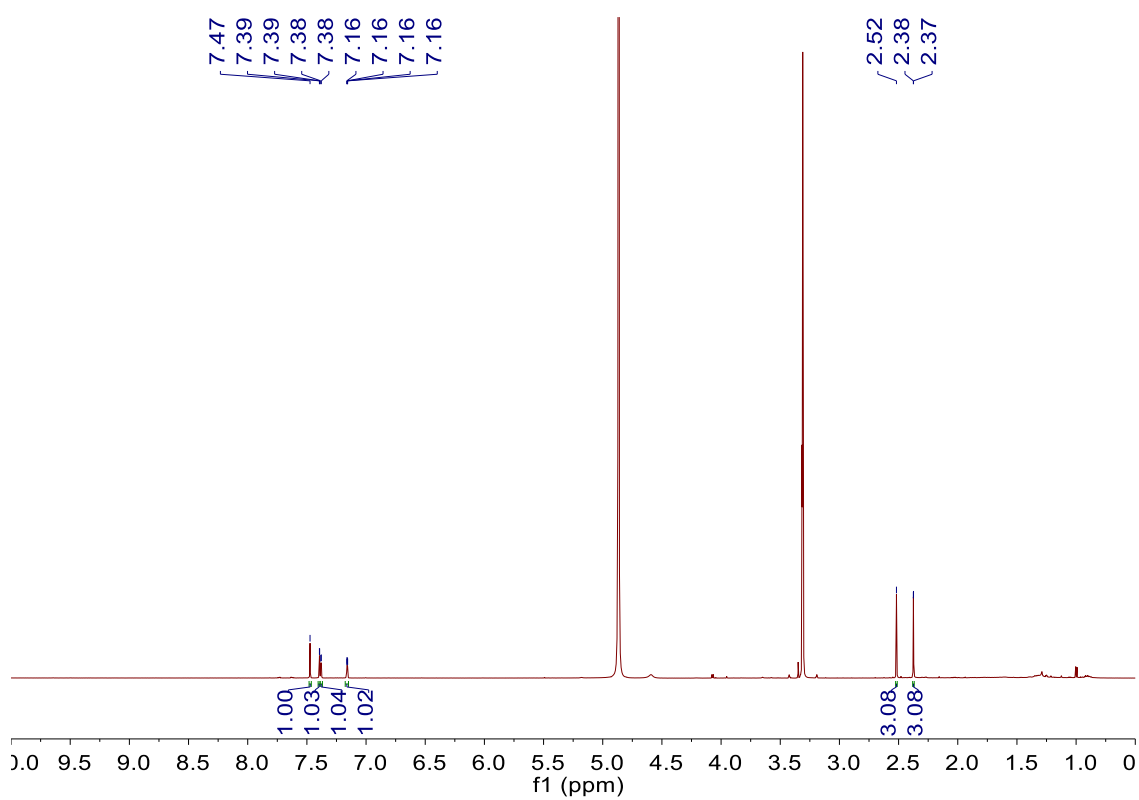

**Figure S14: <sup>1</sup>H NMR spectrum of 3 in methanol-*d*<sub>4</sub>**

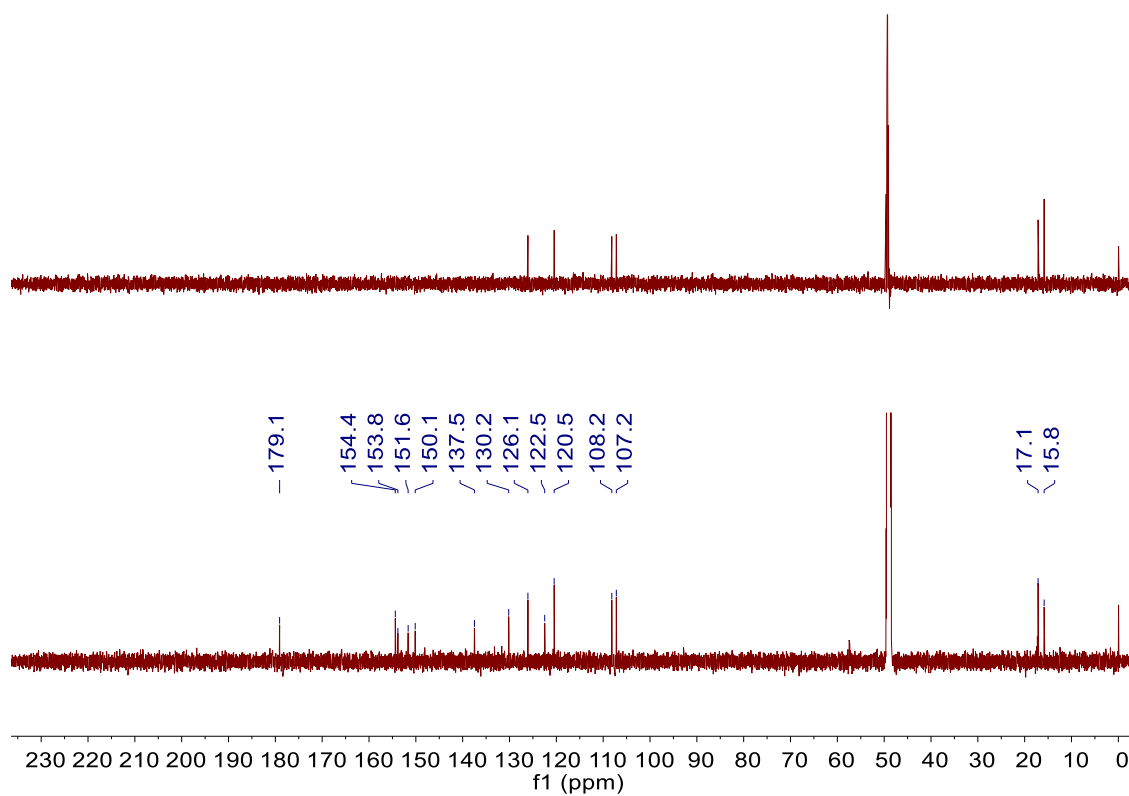

**Figure S15:**  $^{13}\text{C}$  NMR and DEPT spectrum of **3** in methanol- $d_4$

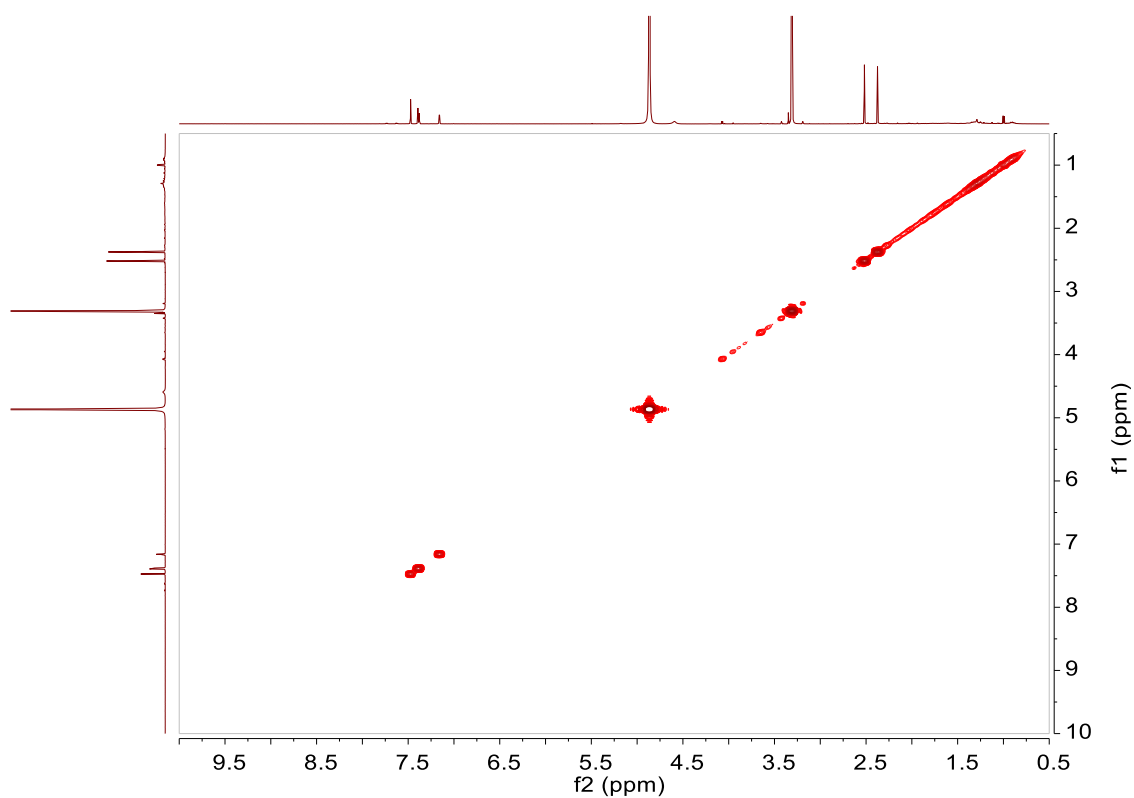

**Figure S16:**  $^1\text{H}$ - $^1\text{H}$  COSY spectrum of **3** in methanol- $d_4$

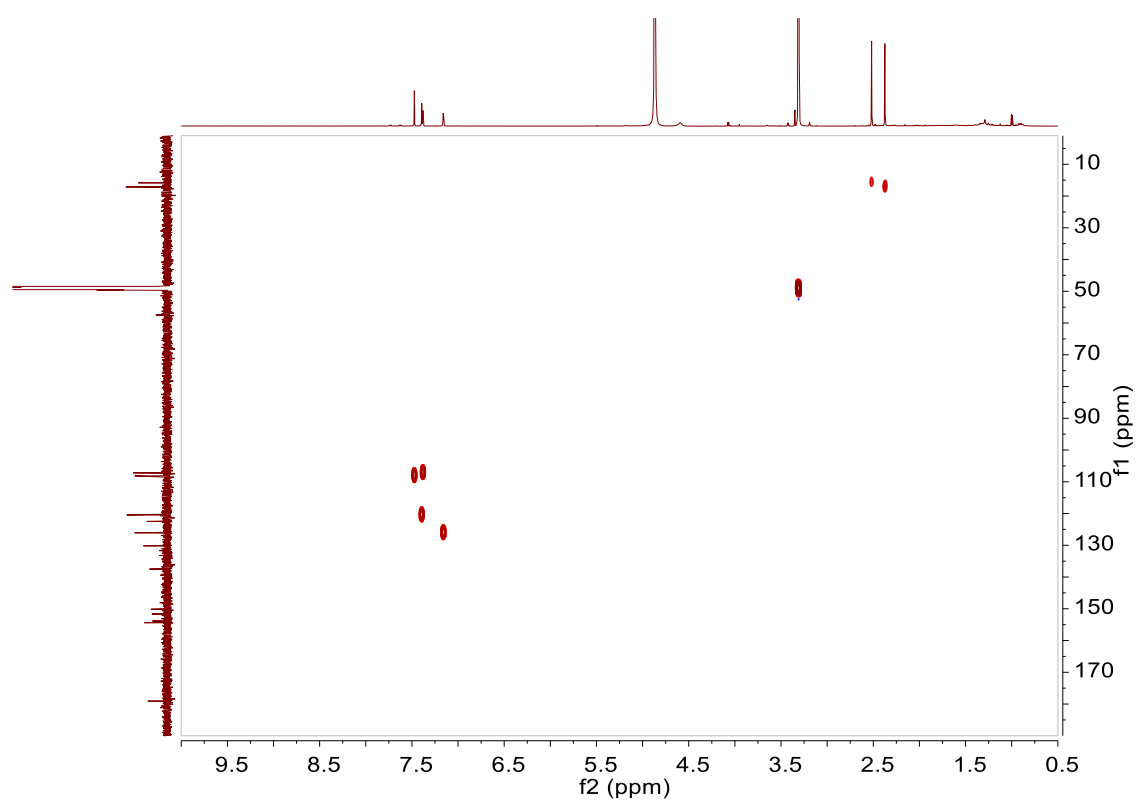

**Figure S17:** HSQC spectrum of **3** in methanol- $d_4$

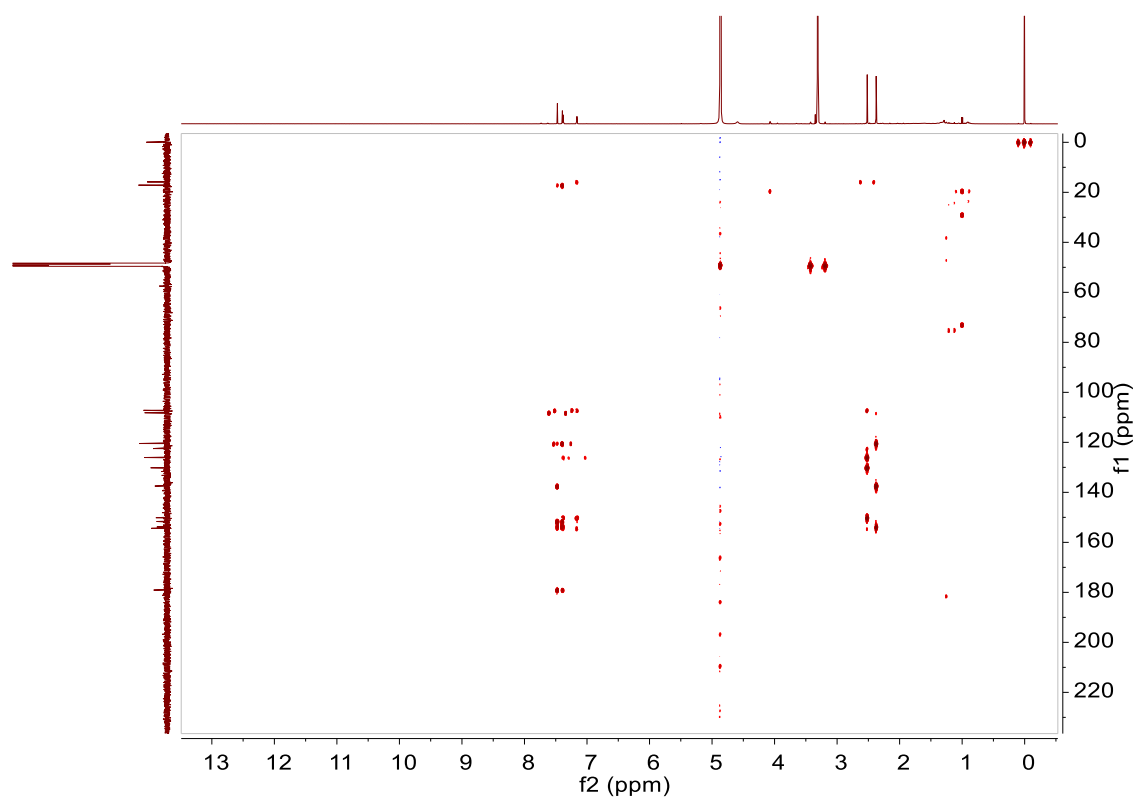

**Figure S18:** HMBC spectrum of **3** in methanol- $d_4$

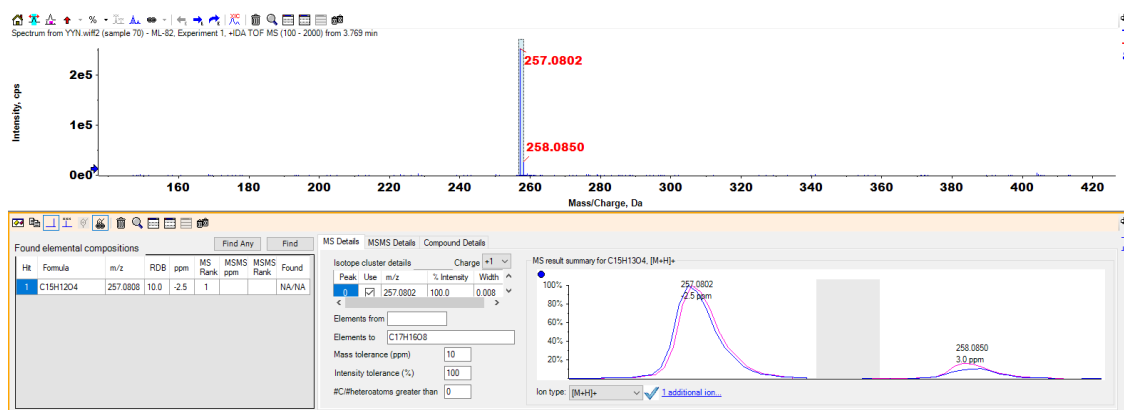

**Figure S19:** HRESIMS spectrum of **3**

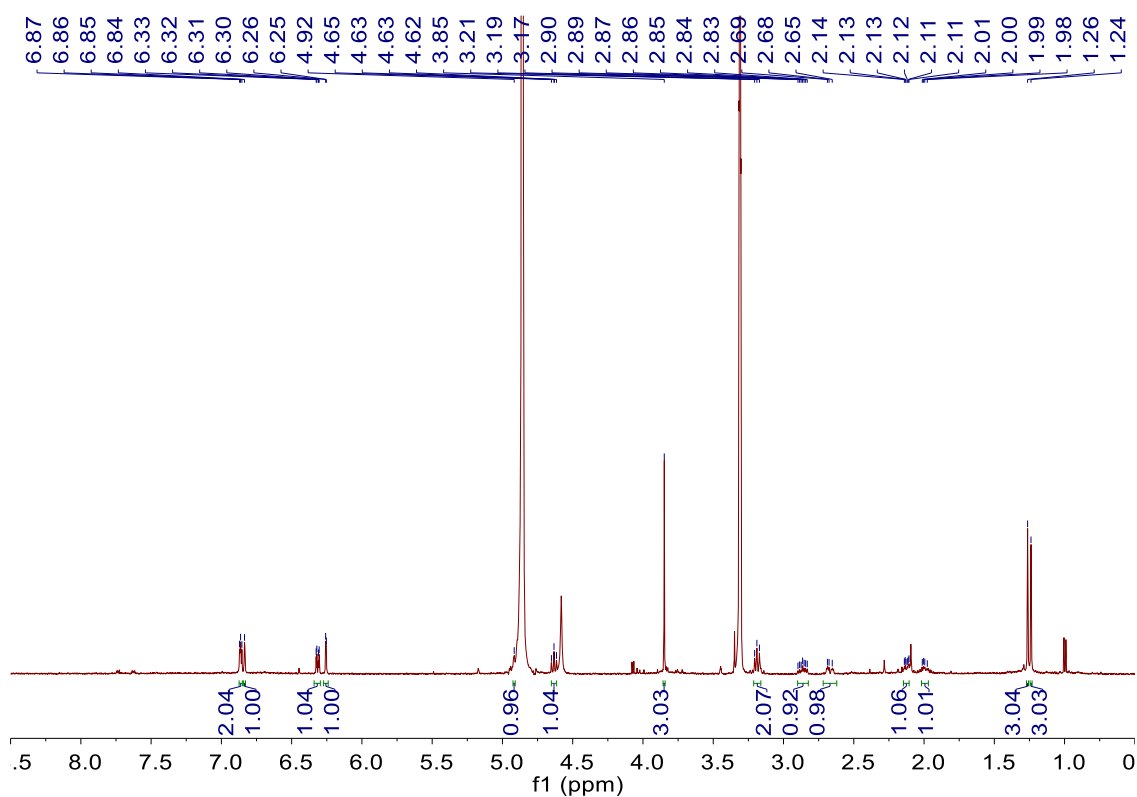

**Figure S20:** <sup>1</sup>H NMR spectrum of **4** in methanol-*d*<sub>4</sub>

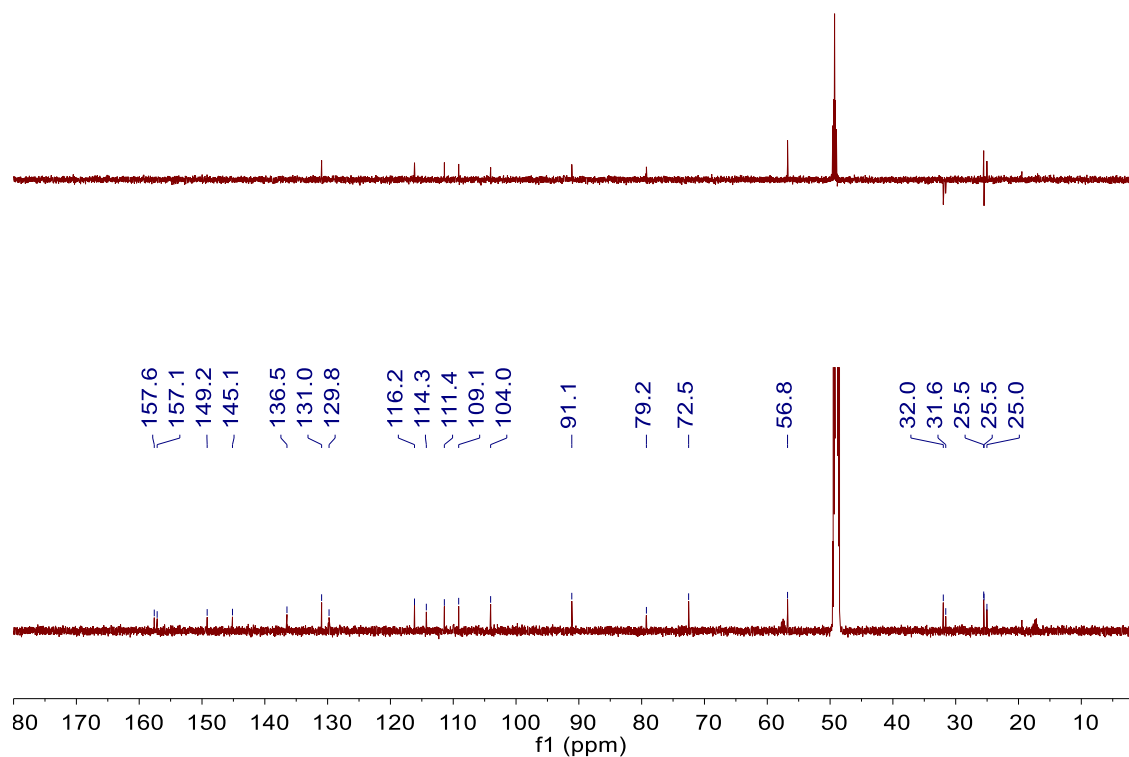

**Figure S21:**  $^{13}\text{C}$  NMR and DEPT spectrum of **4** in methanol- $d_4$

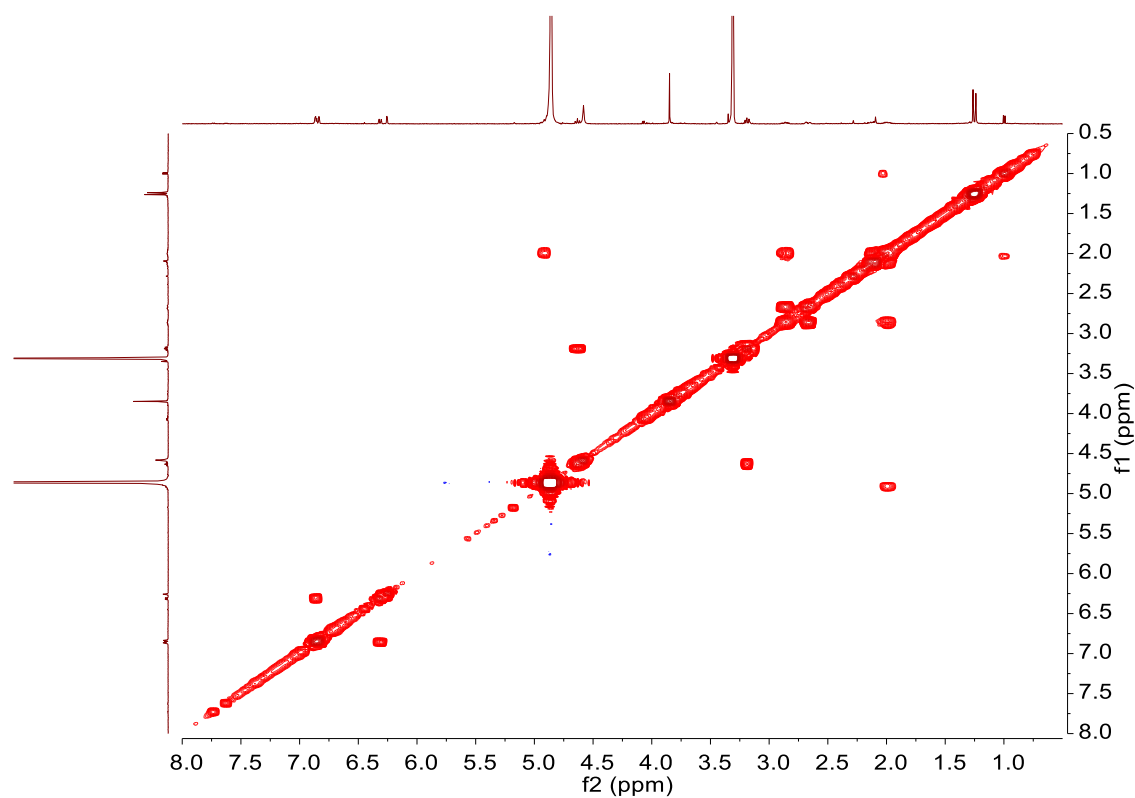

**Figure S22:**  $^1\text{H}$ - $^1\text{H}$  COSY spectrum of **4** in methanol- $d_4$

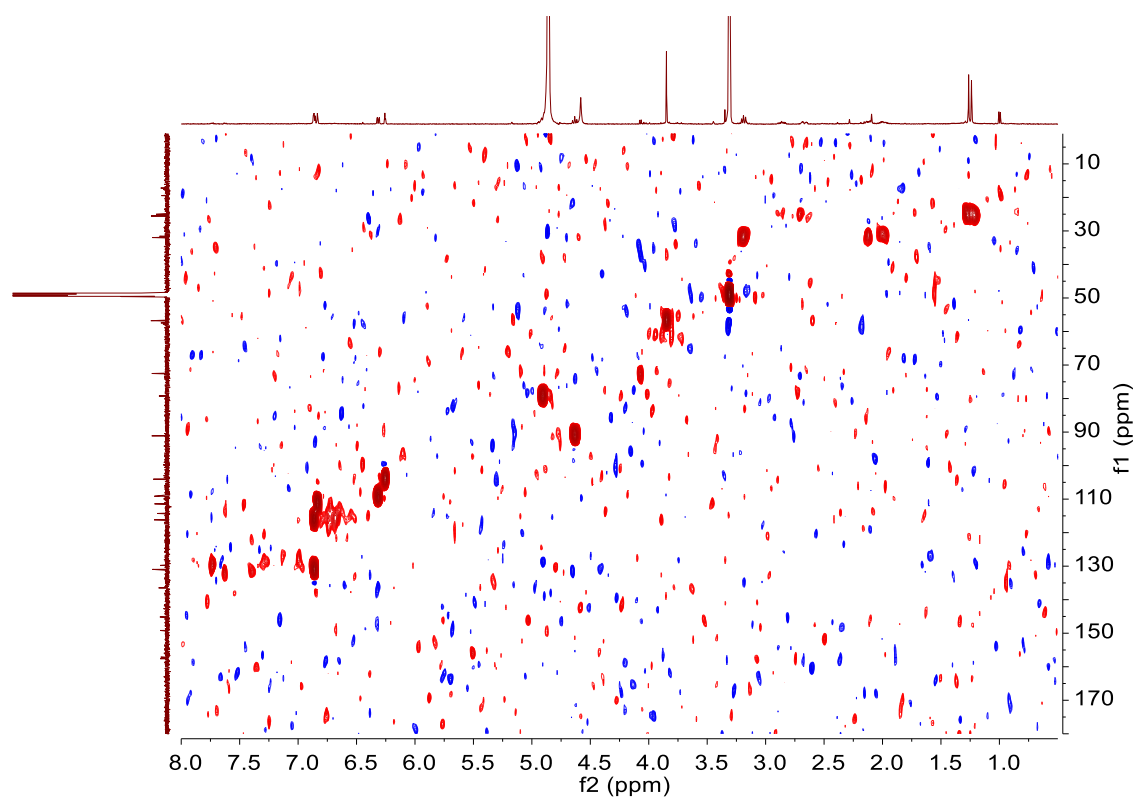

**Figure S23:** HSQC spectrum of **4** in methanol- $d_4$

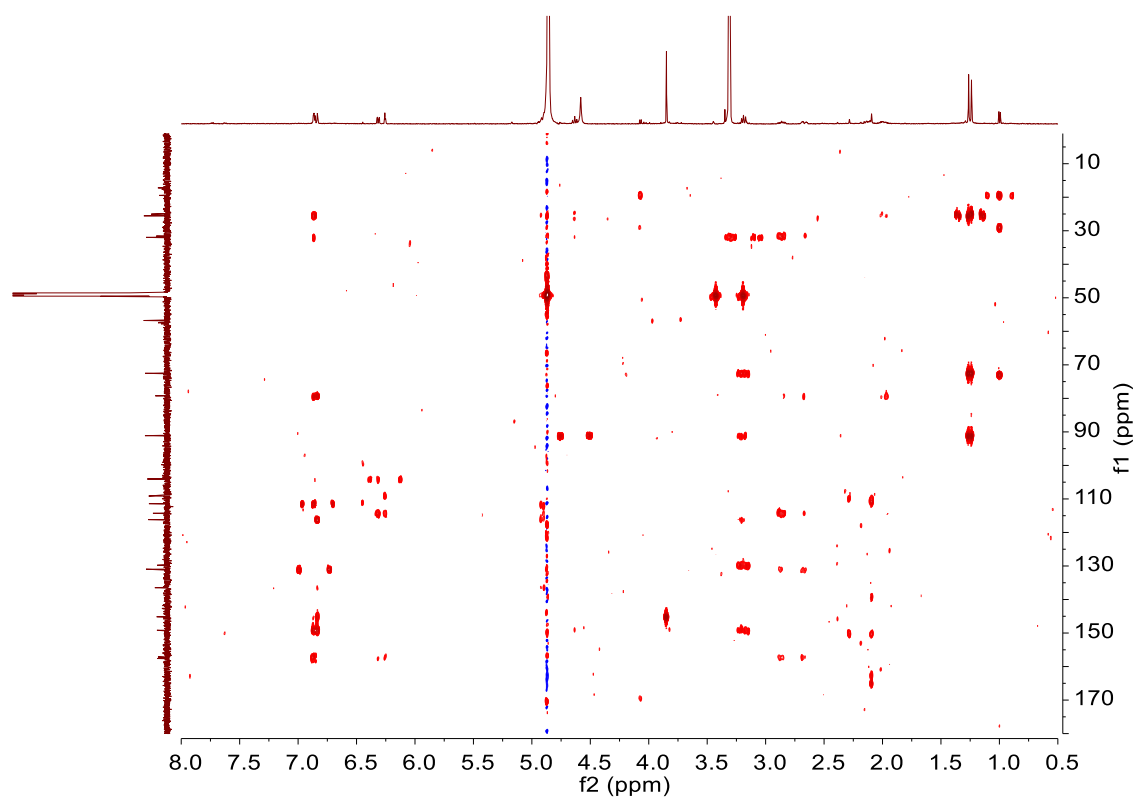

**Figure S24:** HMBC spectrum of **4** in methanol- $d_4$

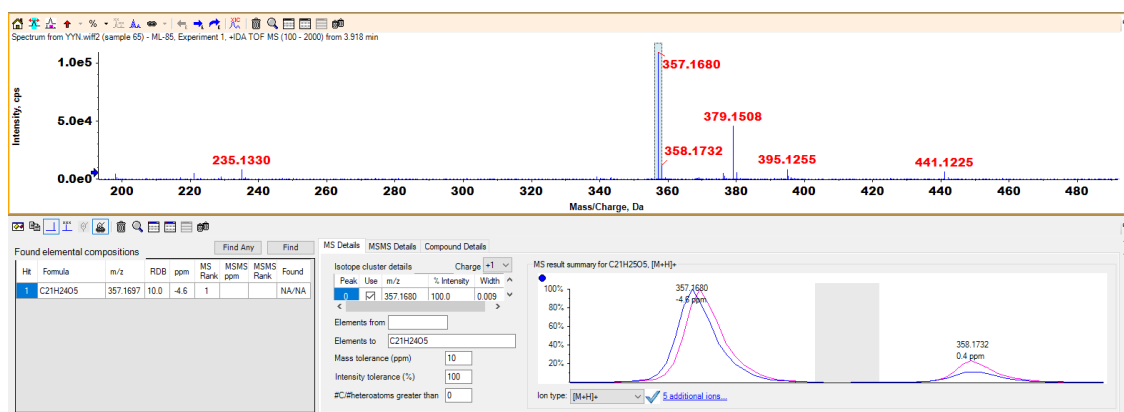

**Figure S25:** HRESIMS spectrum of **4**

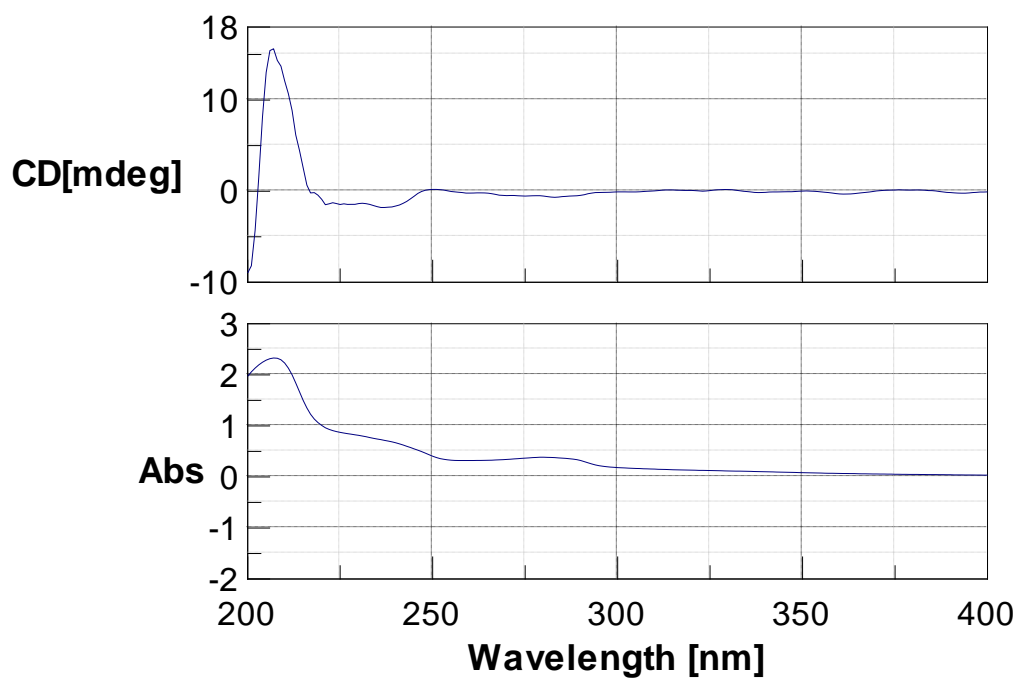

**Figure S26:** CD spectrum of **4** in MeOH

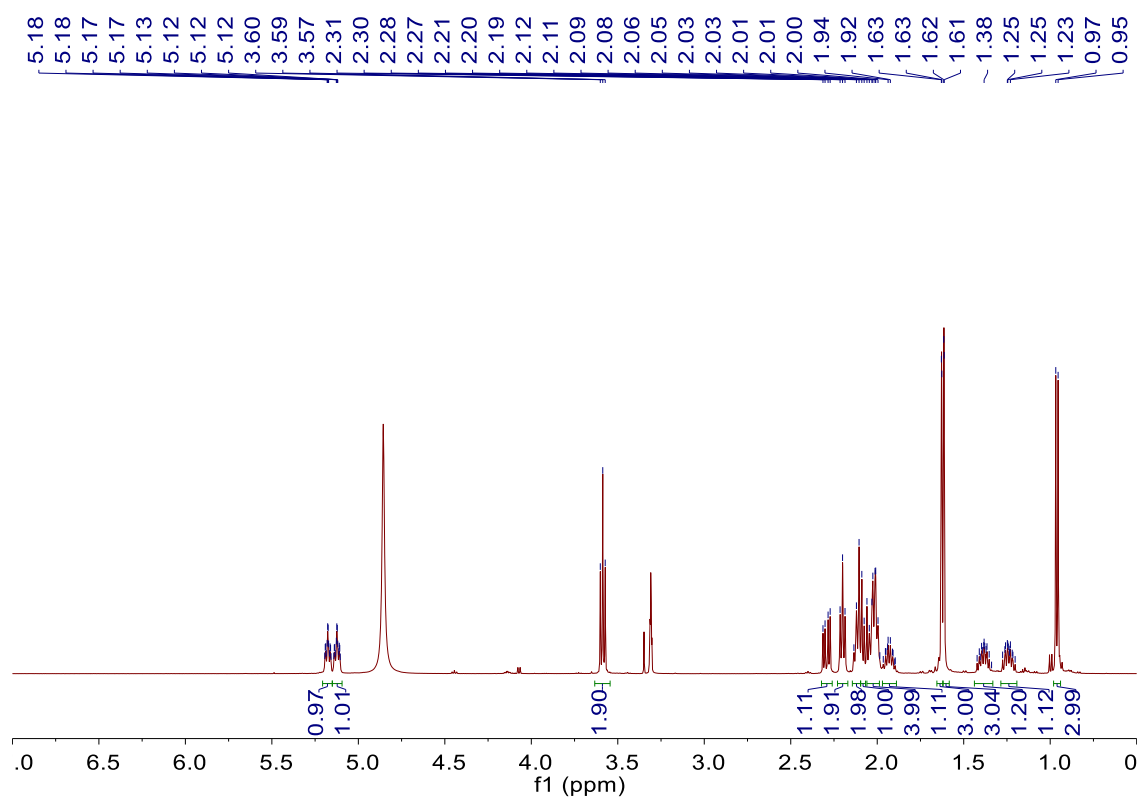

Figure S27:  $^1\text{H}$  NMR spectrum of **7** in methanol- $d_4$

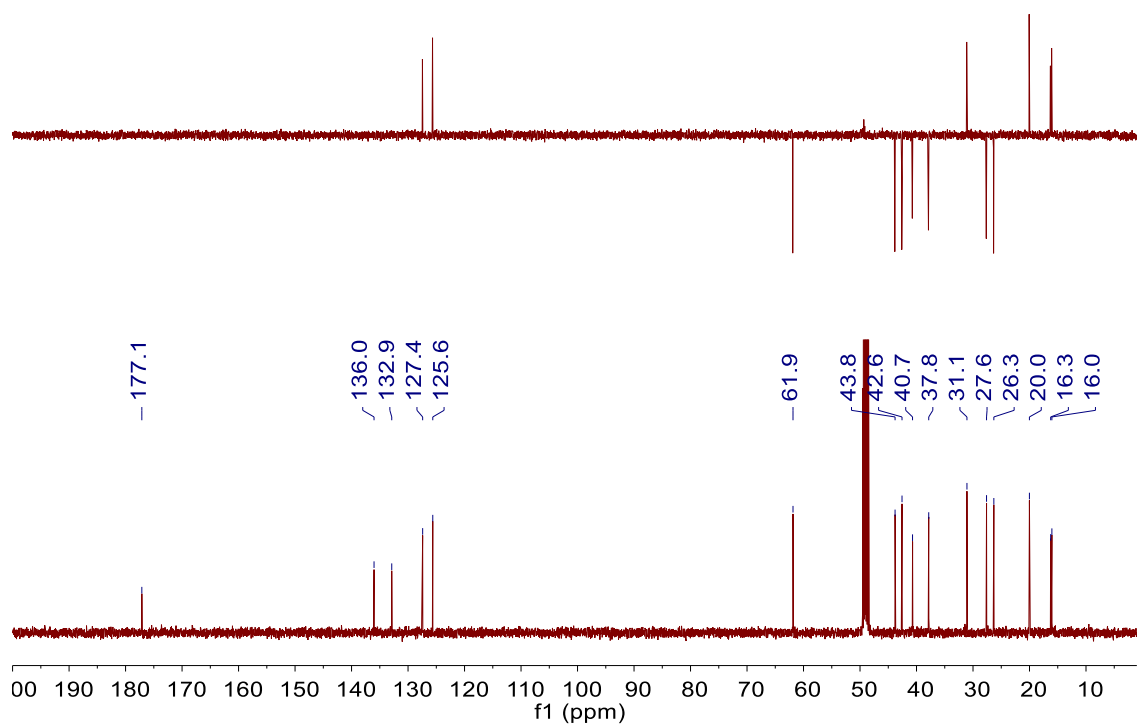

Figure S28:  $^{13}\text{C}$  NMR and DEPT spectrum of **7** in methanol- $d_4$



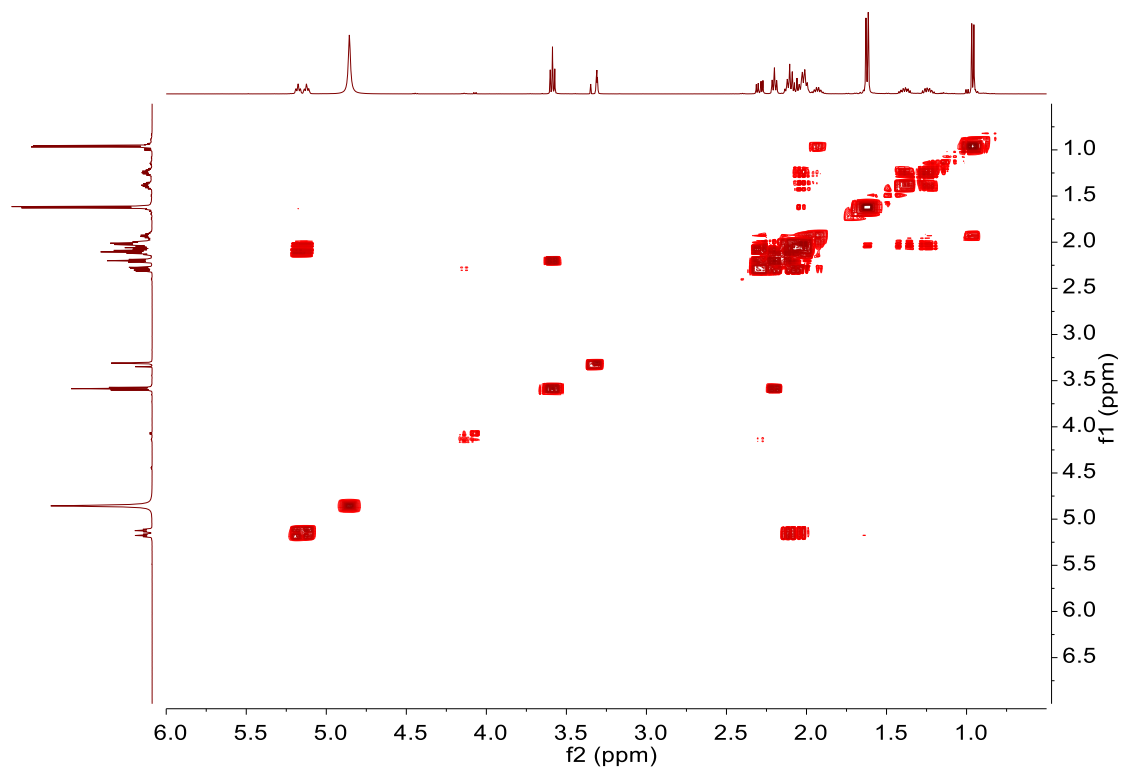

**Figure S29:**  $^1\text{H}$ - $^1\text{H}$  COSY spectrum of **7** in methanol- $d_4$

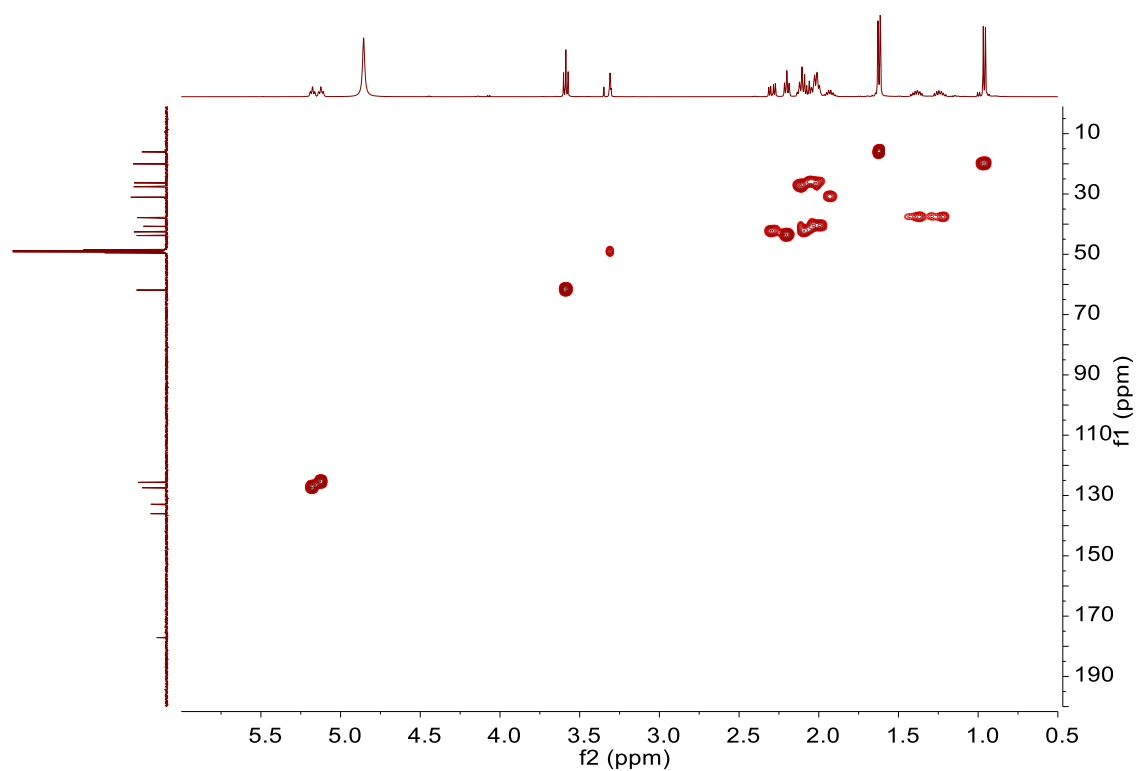

**Figure S30:** HSQC spectrum of **7** in methanol- $d_4$

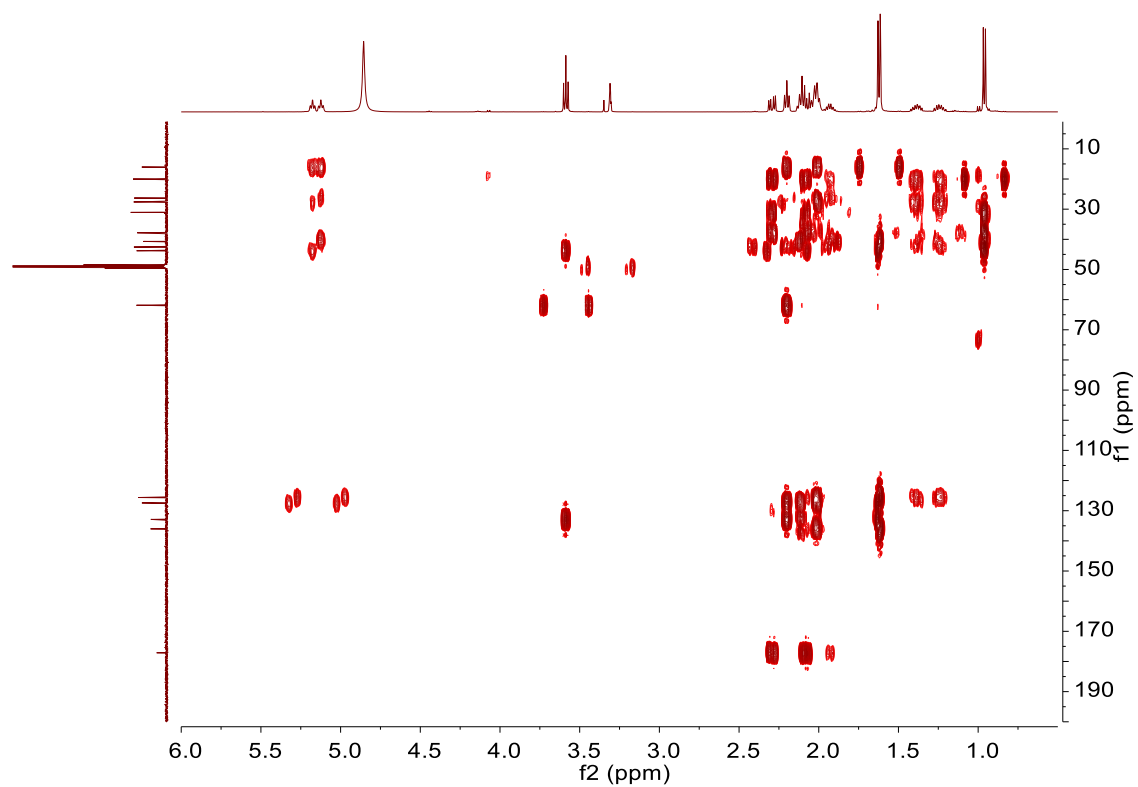

**Figure S31:** HMBC spectrum of **7** in methanol- $d_4$

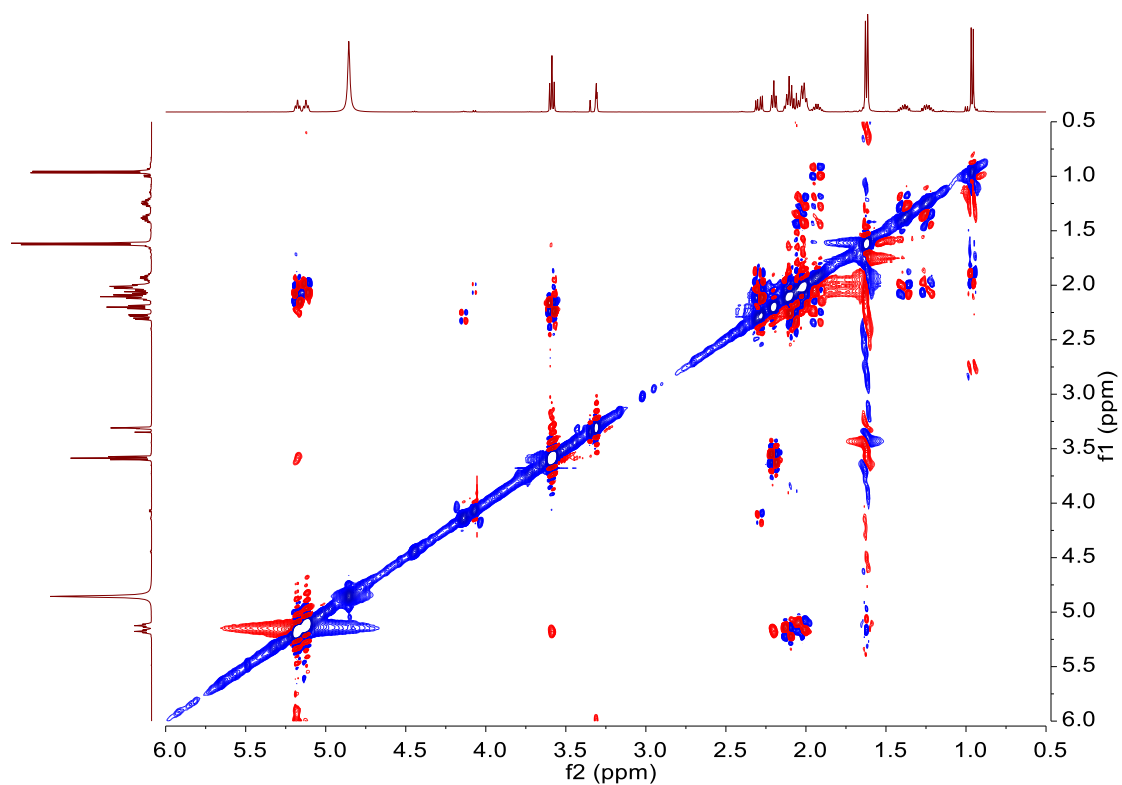

**Figure S32:** ROESY spectrum of **7** in methanol- $d_4$

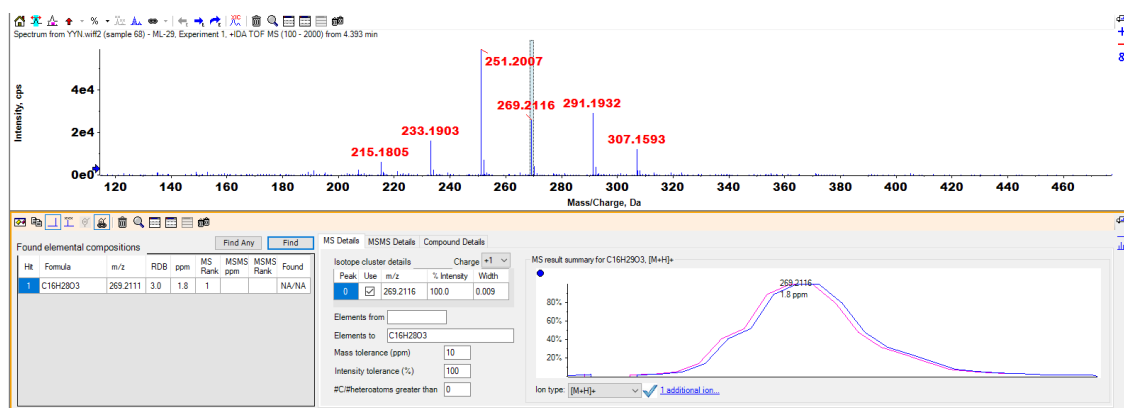

Figure S33: HRESIMS spectrum of **7**

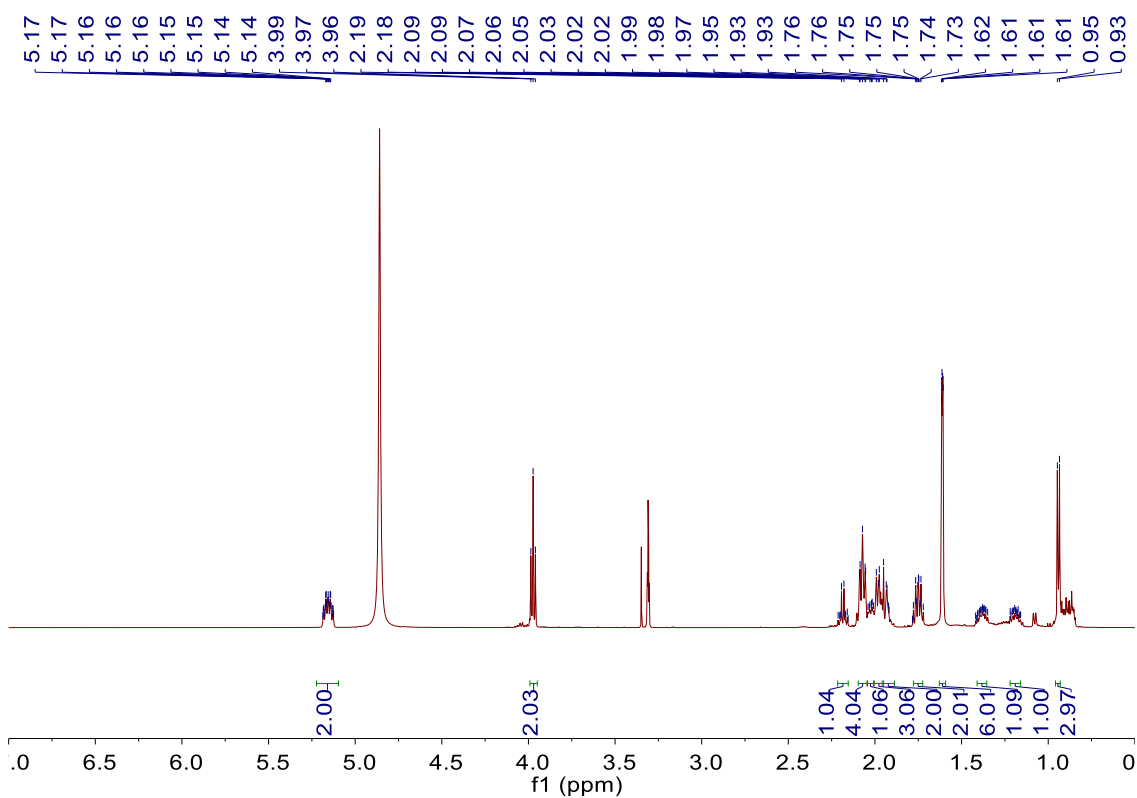

Figure S34: <sup>1</sup>H NMR spectrum of **8** in methanol-*d*<sub>4</sub>

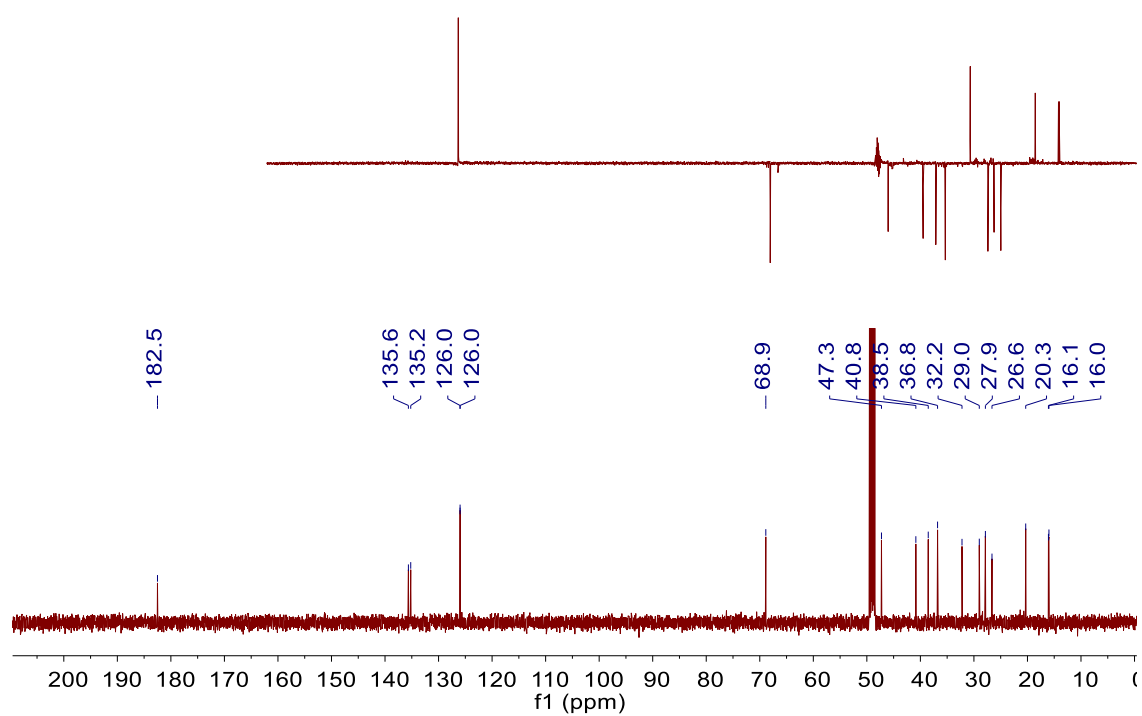

**Figure S35:** <sup>13</sup>C NMR and DEPT spectrum of **8** in methanol-*d*<sub>4</sub>

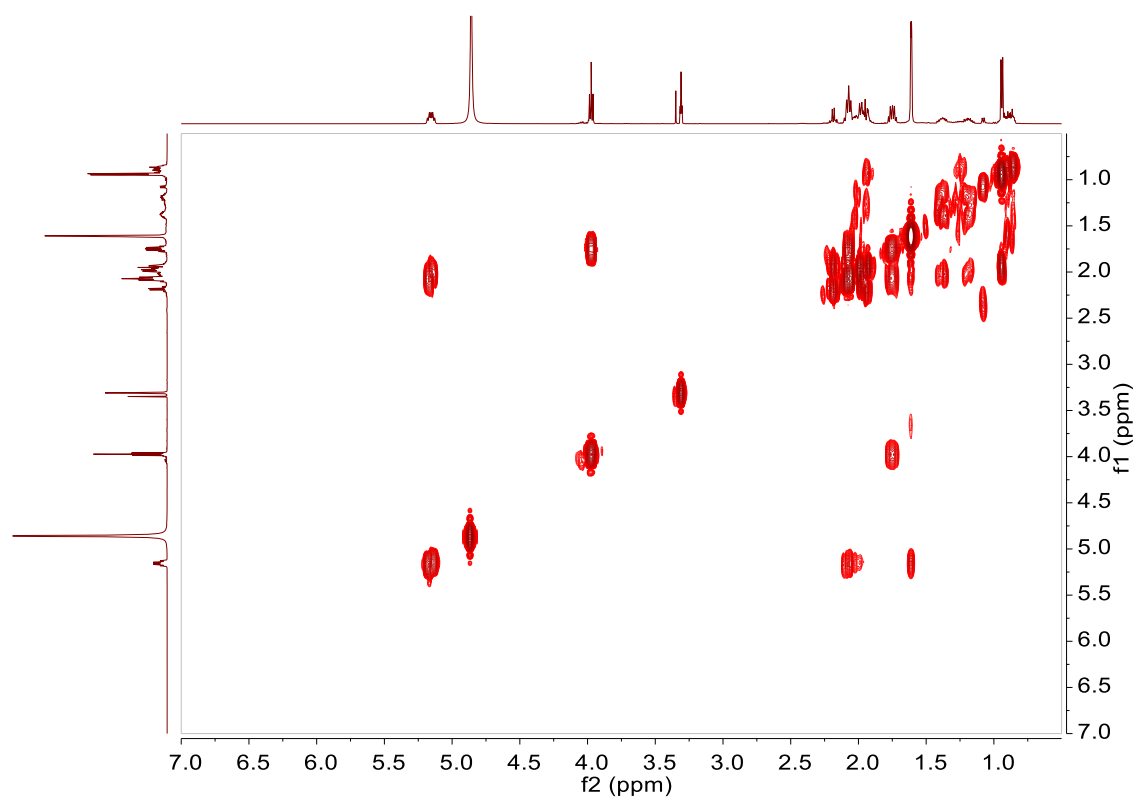

**Figure S36:** <sup>1</sup>H-<sup>1</sup>H COSY spectrum of **8** in methanol-*d*<sub>4</sub>

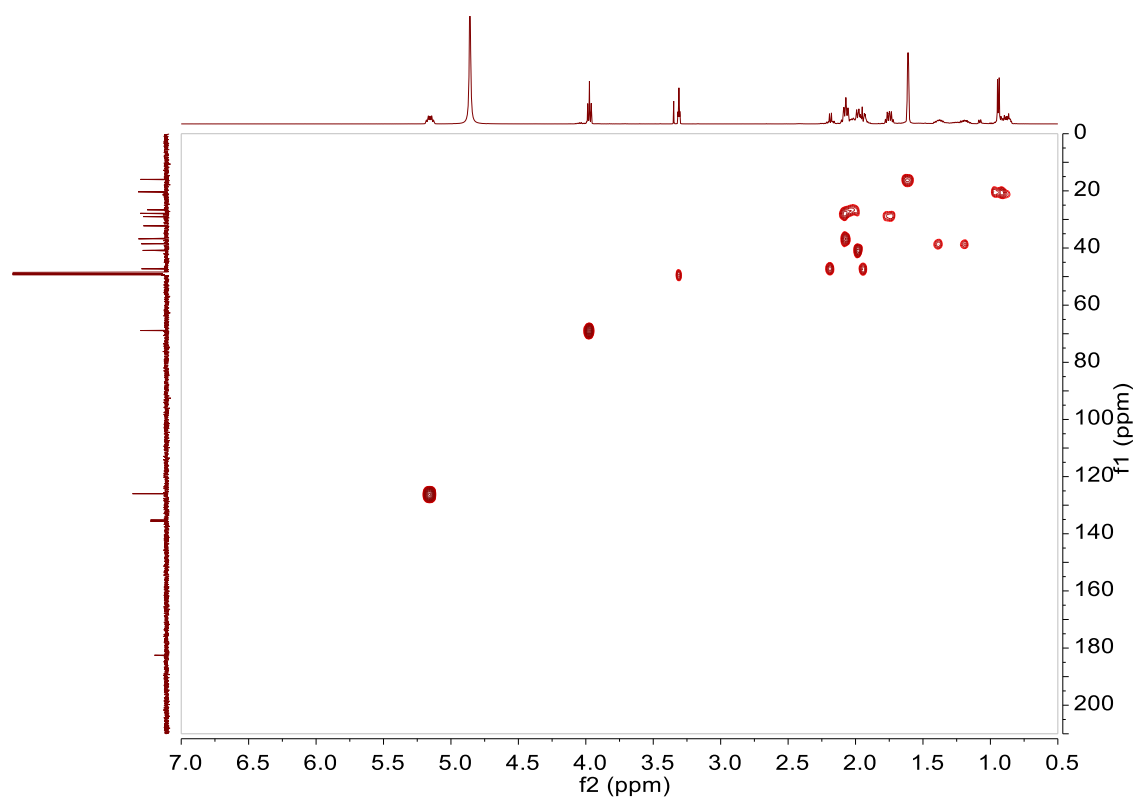

**Figure S37:** HSQC spectrum of **8** in methanol- $d_4$

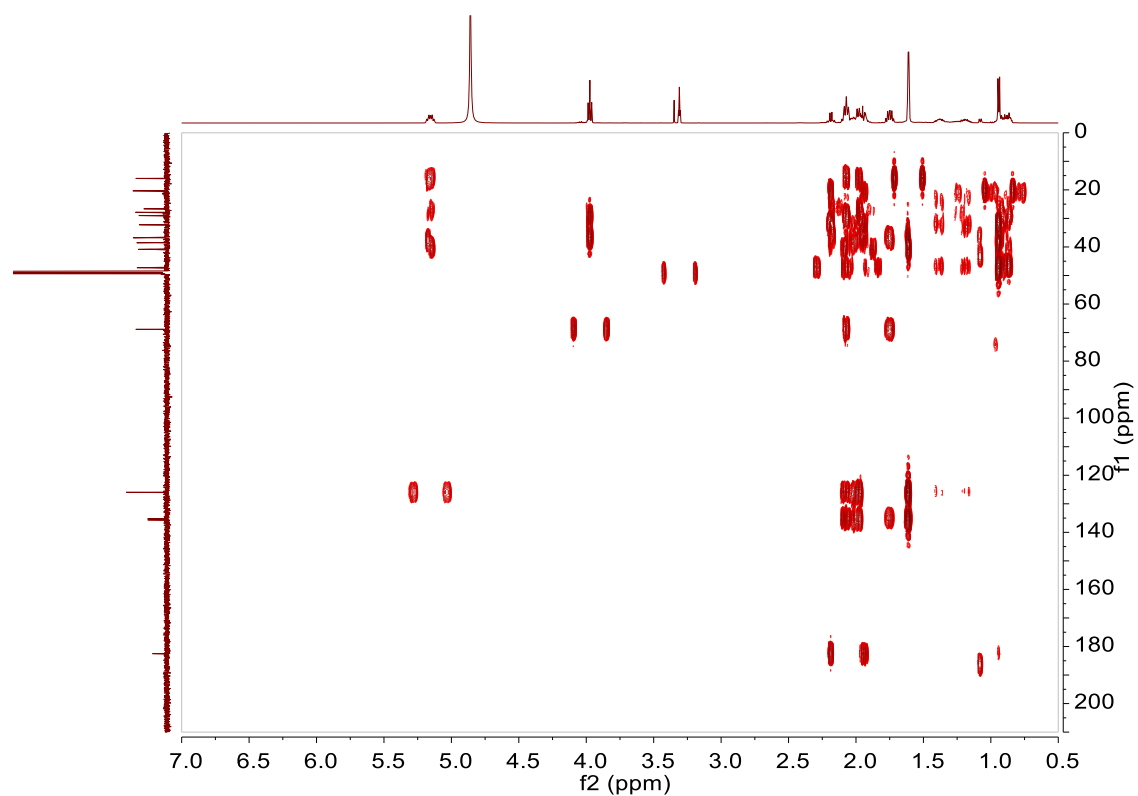

**Figure S38:** HMBC spectrum of **8** in methanol- $d_4$

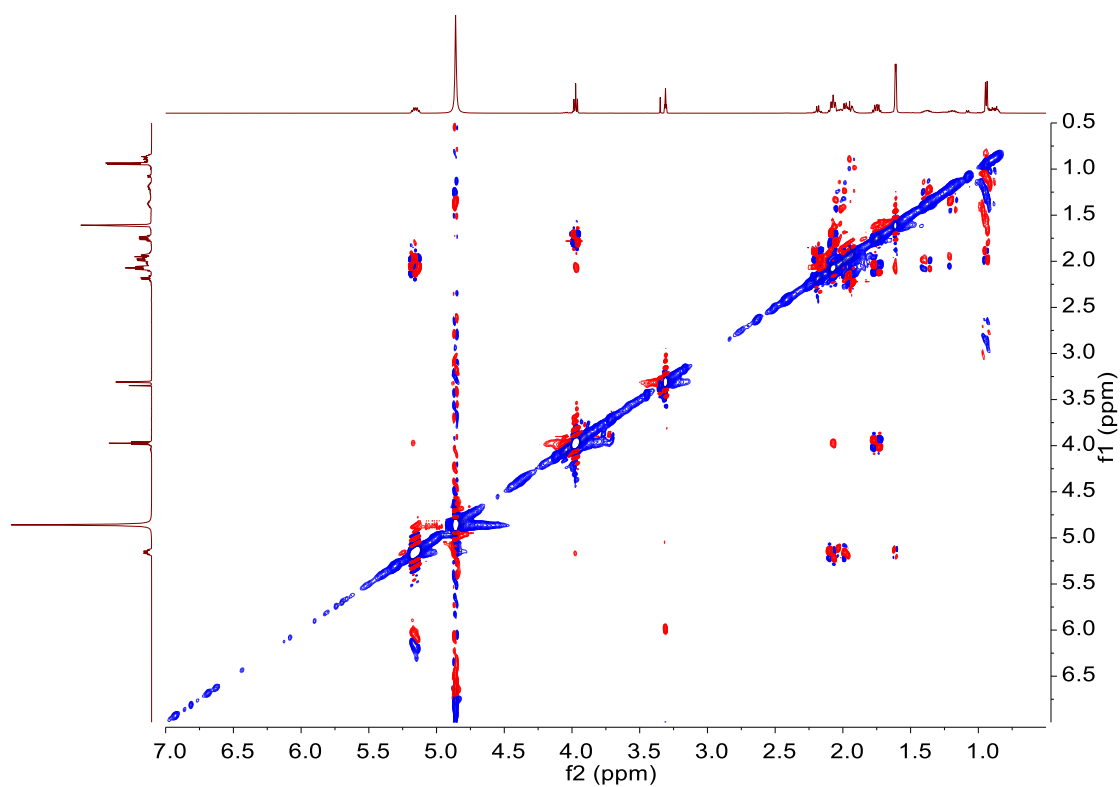

**Figure S39:** ROESY spectrum of **8** in methanol- $d_4$

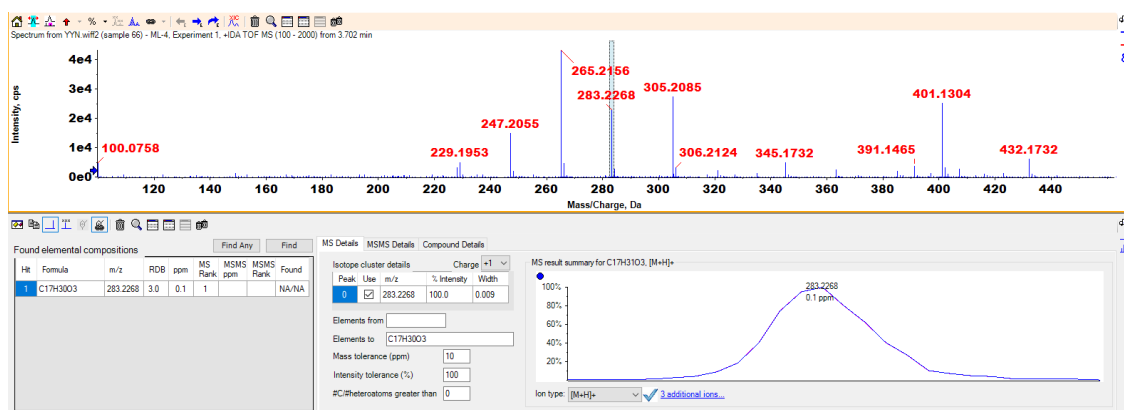

**Figure S40:** HRESIMS spectrum of **8**

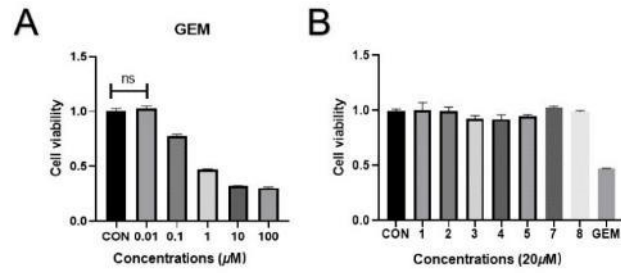

**Figure S41.** Compounds inhibited proliferation of Panc02-h7-GP-GFP cells. Cells were treated with gemcitabine, compounds at a 20  $\mu\text{M}$  concentration, or DMSO for 48 h. The proliferation of Panc02-h7-GP-GFP cells in response to gemcitabine and the compounds was assessed by the CCK-8 assay. **A**, gemcitabine (GEM) inhibited proliferation of Panc02-h7-GP-GFP cells at 0.01, 0.1, 1, 10, and 100  $\mu\text{M}$  concentrations. **B**, compounds were ineffective in inhibiting cell proliferation at 20  $\mu\text{M}$ , using DMSO as a control and gemcitabine (GEM) at 1  $\mu\text{M}$  as a positive control drug.

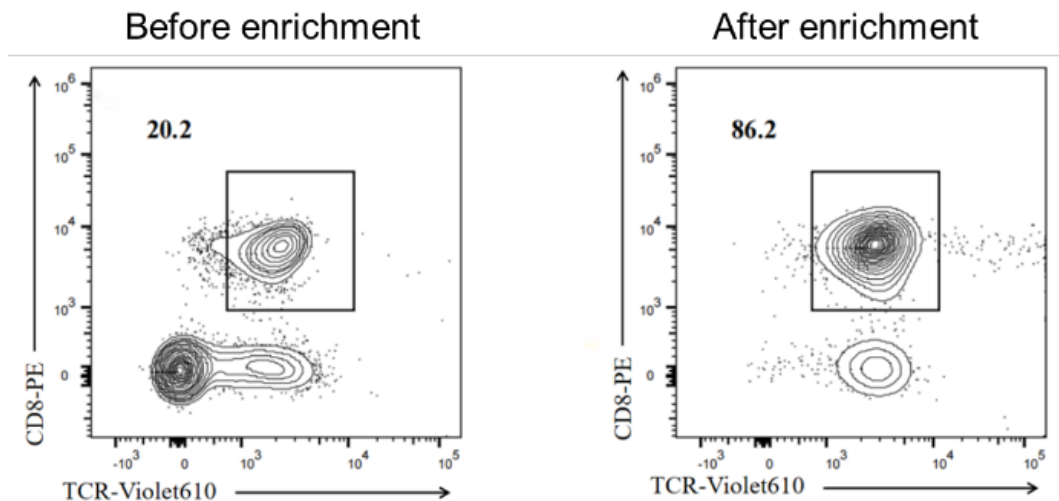

**Figure S42:** Purification of CD8<sup>+</sup>T cells in vitro.

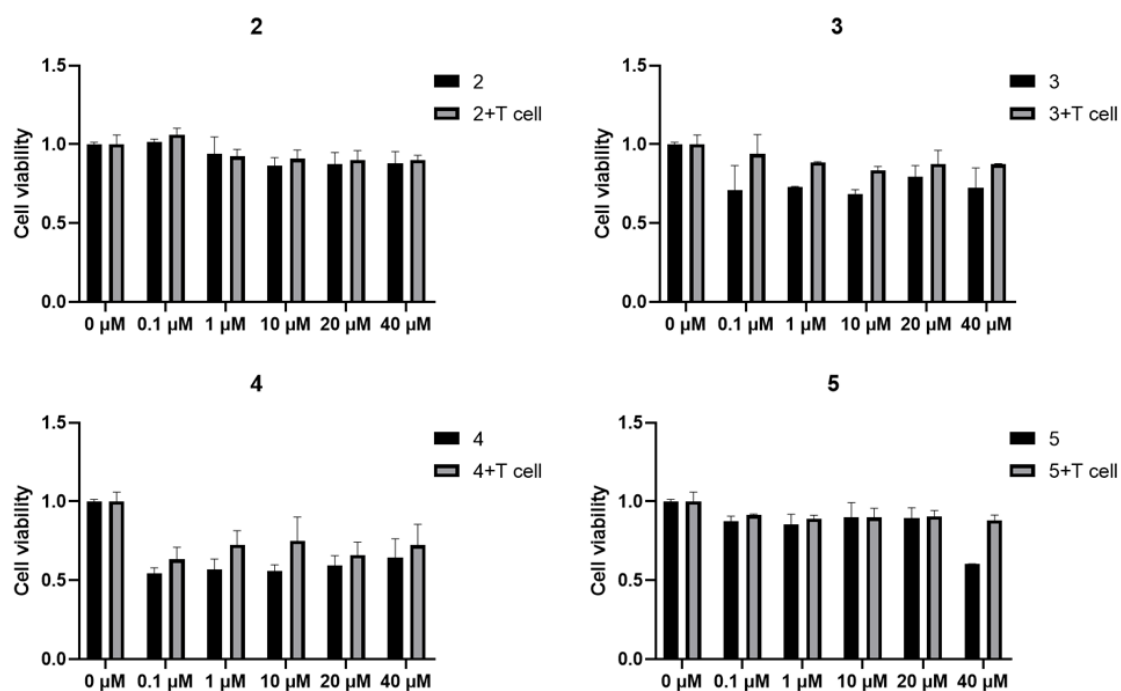

**Figure S43:** Compounds affected the antitumor activity of CD8<sup>+</sup> T cells in vitro. Cells were incubated in the presence of the corresponding concentration of compounds or DMSO for 18 h and the fluorescence intensity was detected by a microplate reader (emission light 476 nm, excitation light 514 nm).
